# Supplementary material for: RICTOR/mTORC2 downregulation in BRAFV600E melanoma cells promotes resistance to BRAF/MEK inhibition
Source: PubMed Central journal article supplement (PMC11097536; doi:10.1186/s12943-024-02010-1), 2024-05-16

Figure 2A

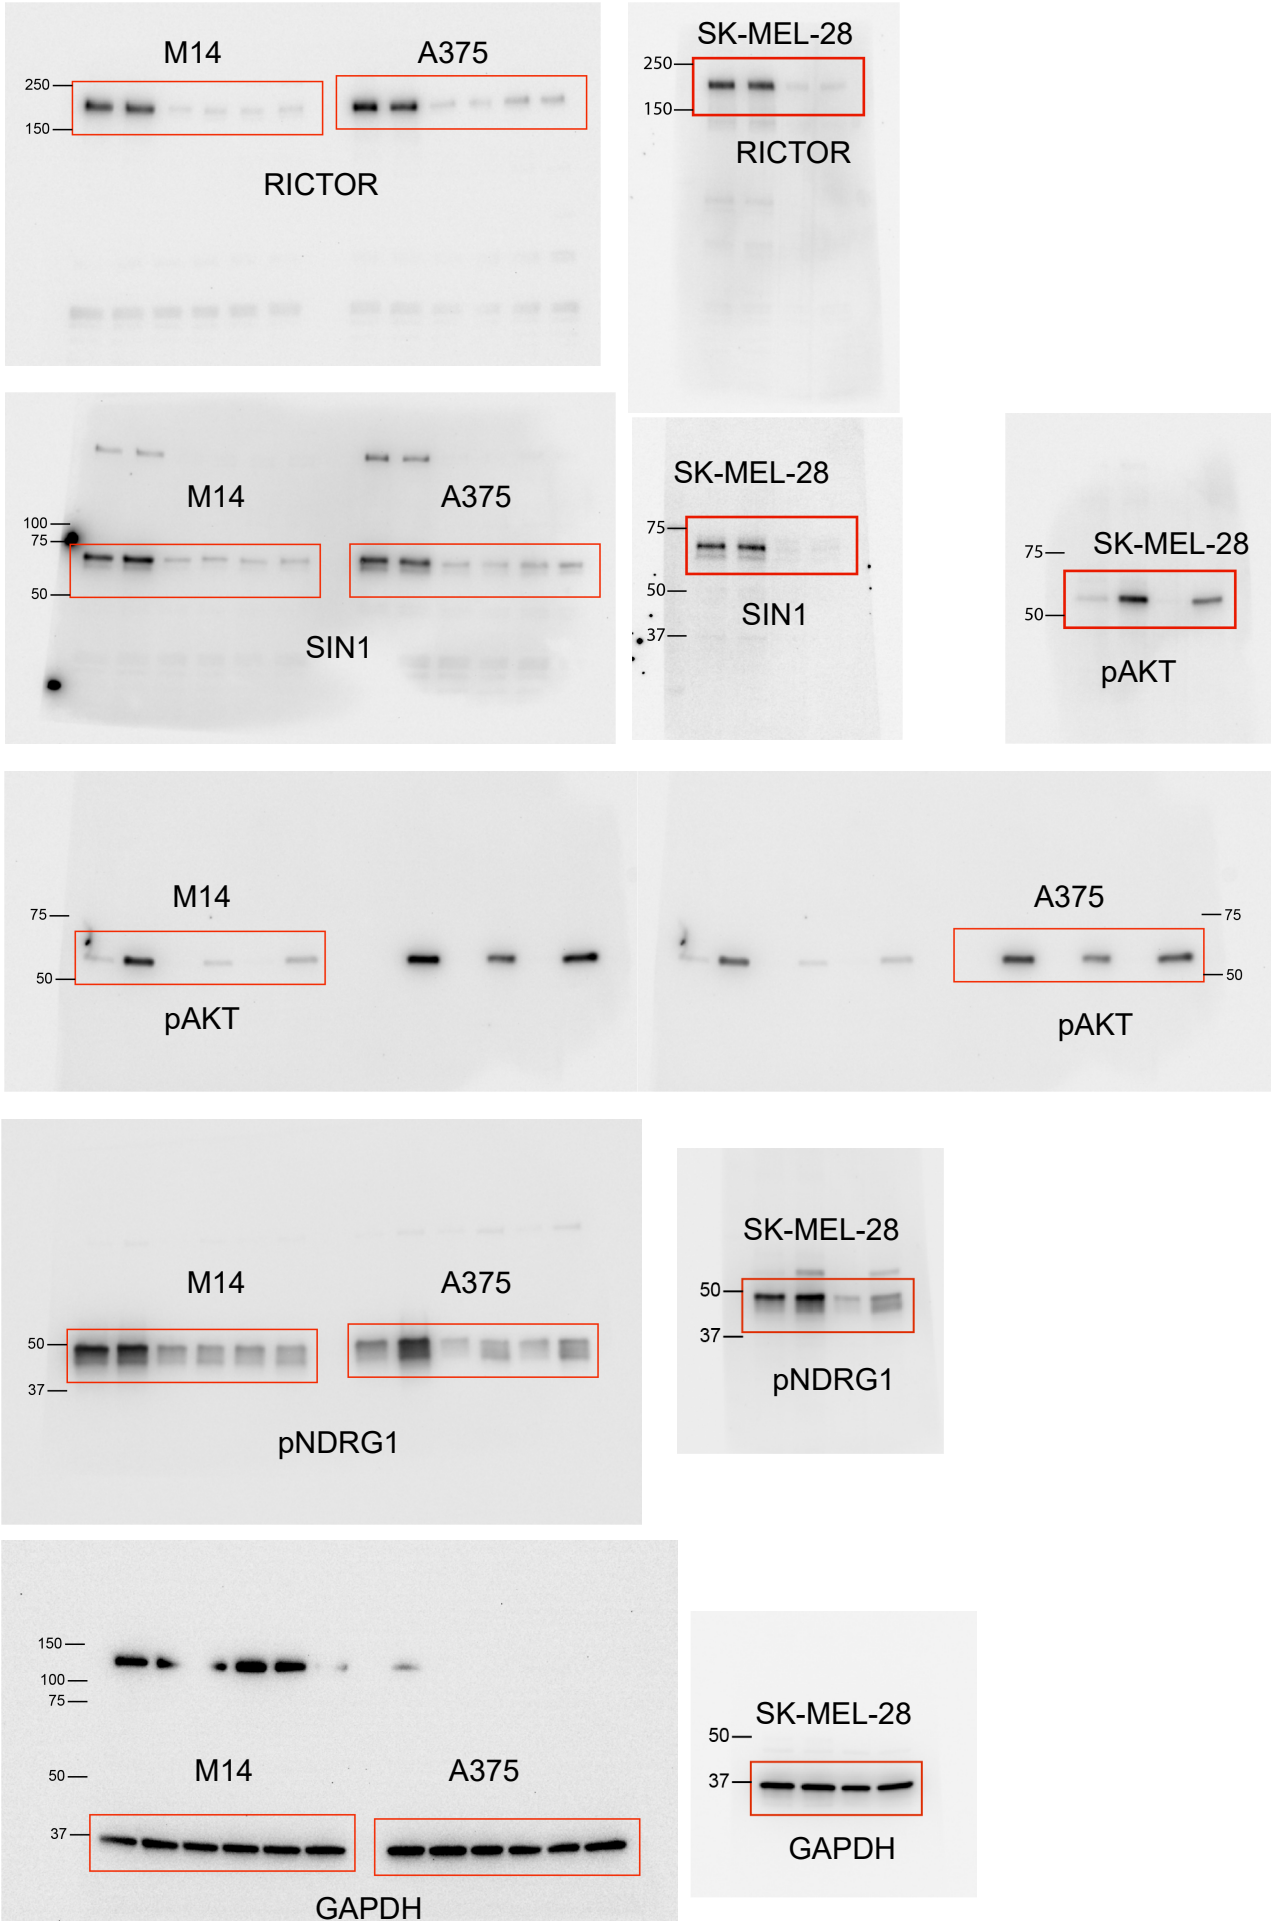

Figure 2D

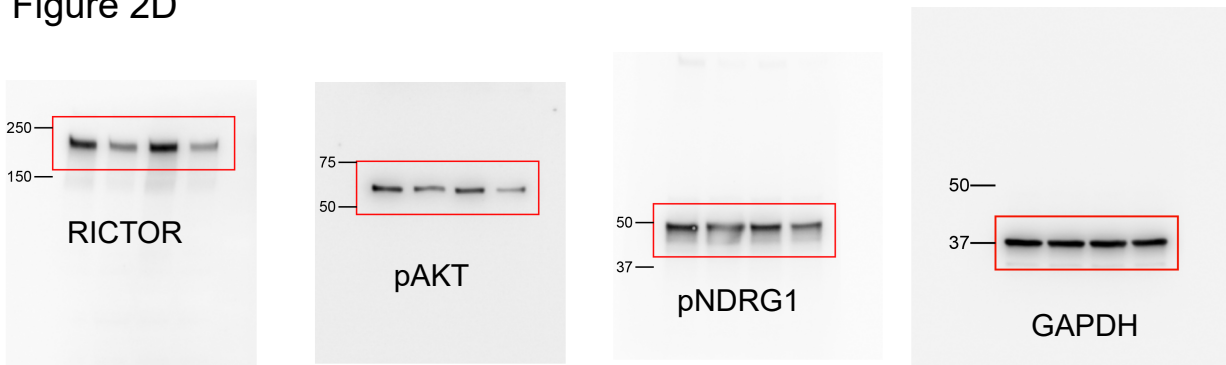

Figure 3A

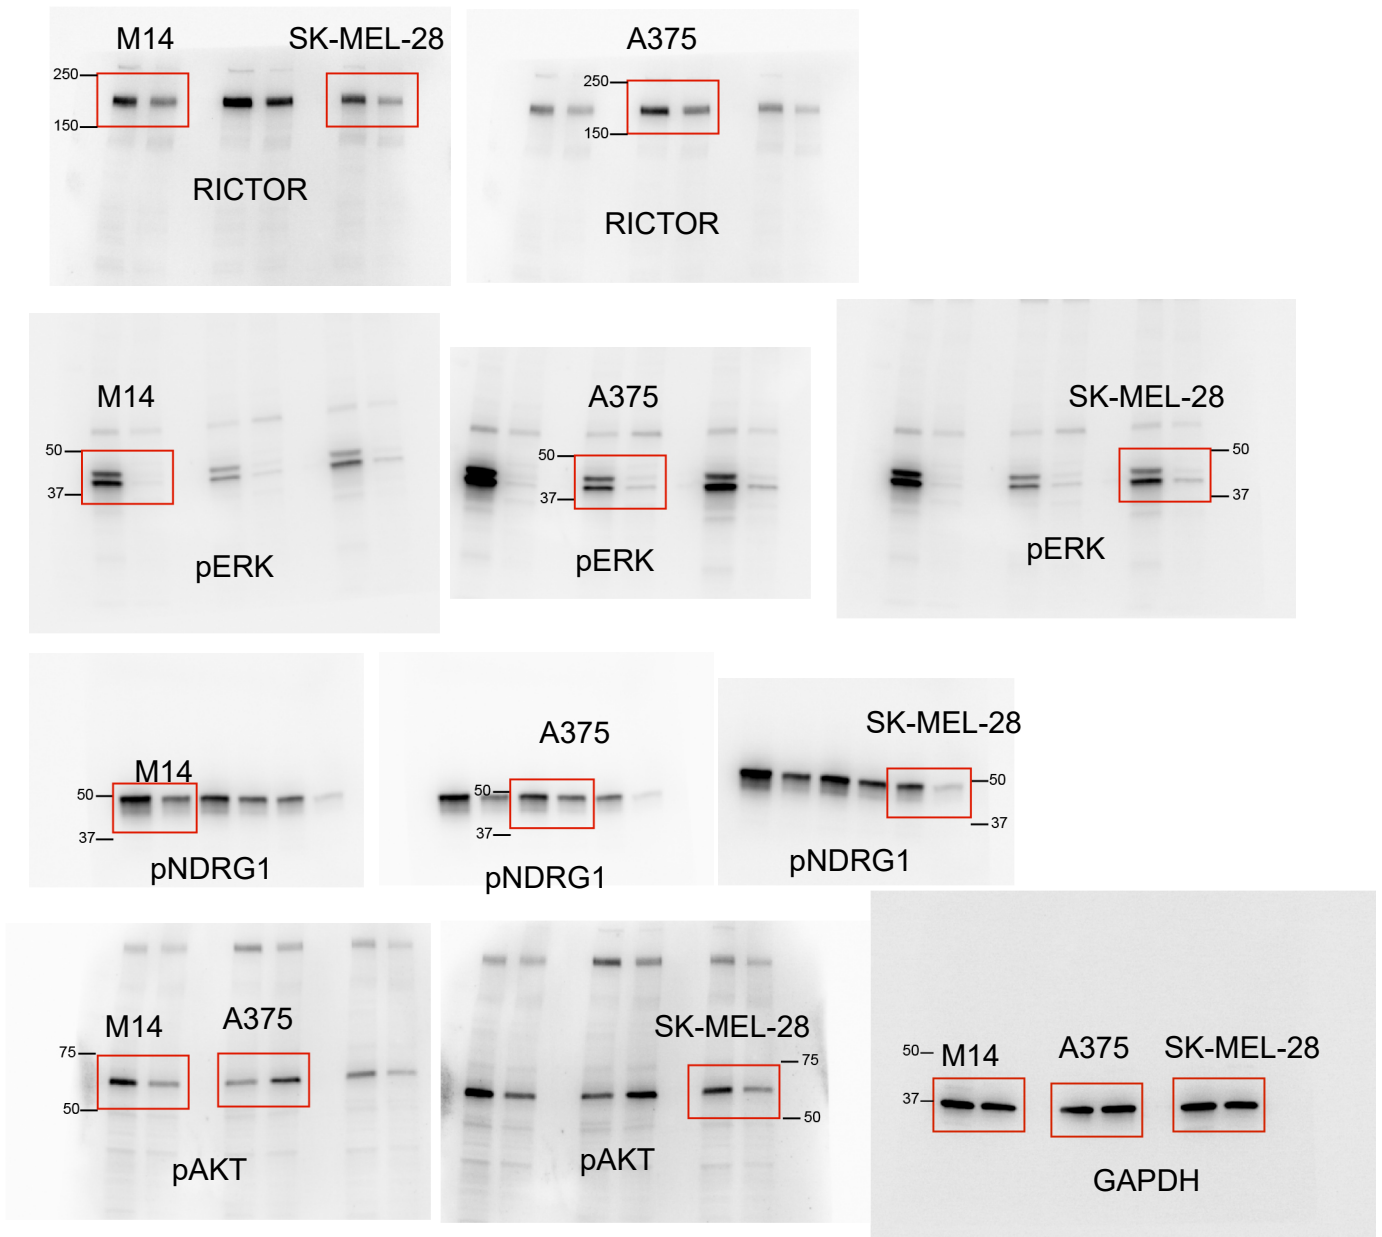

Figure 3C

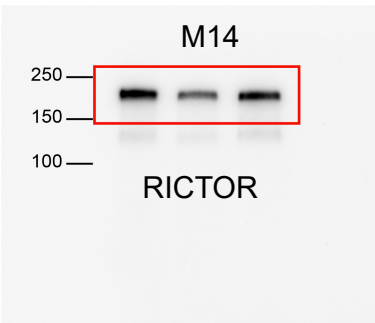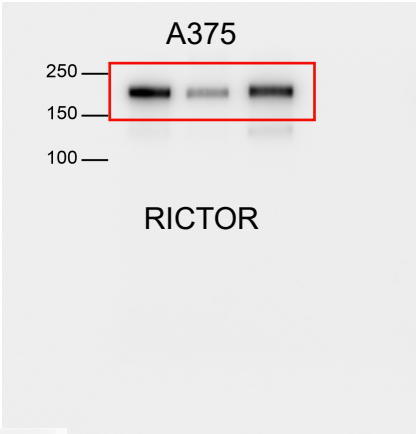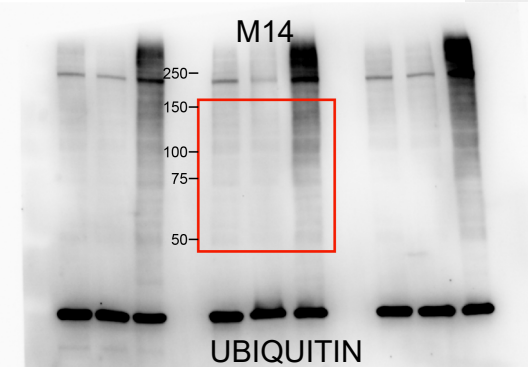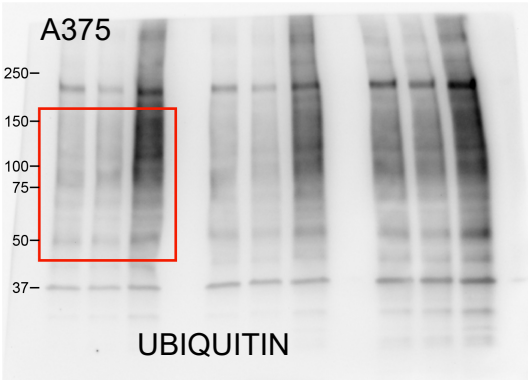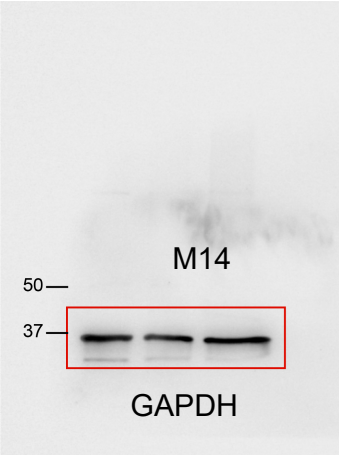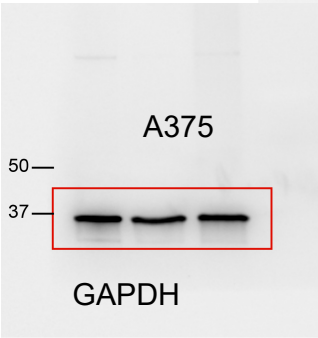

Figure 3D

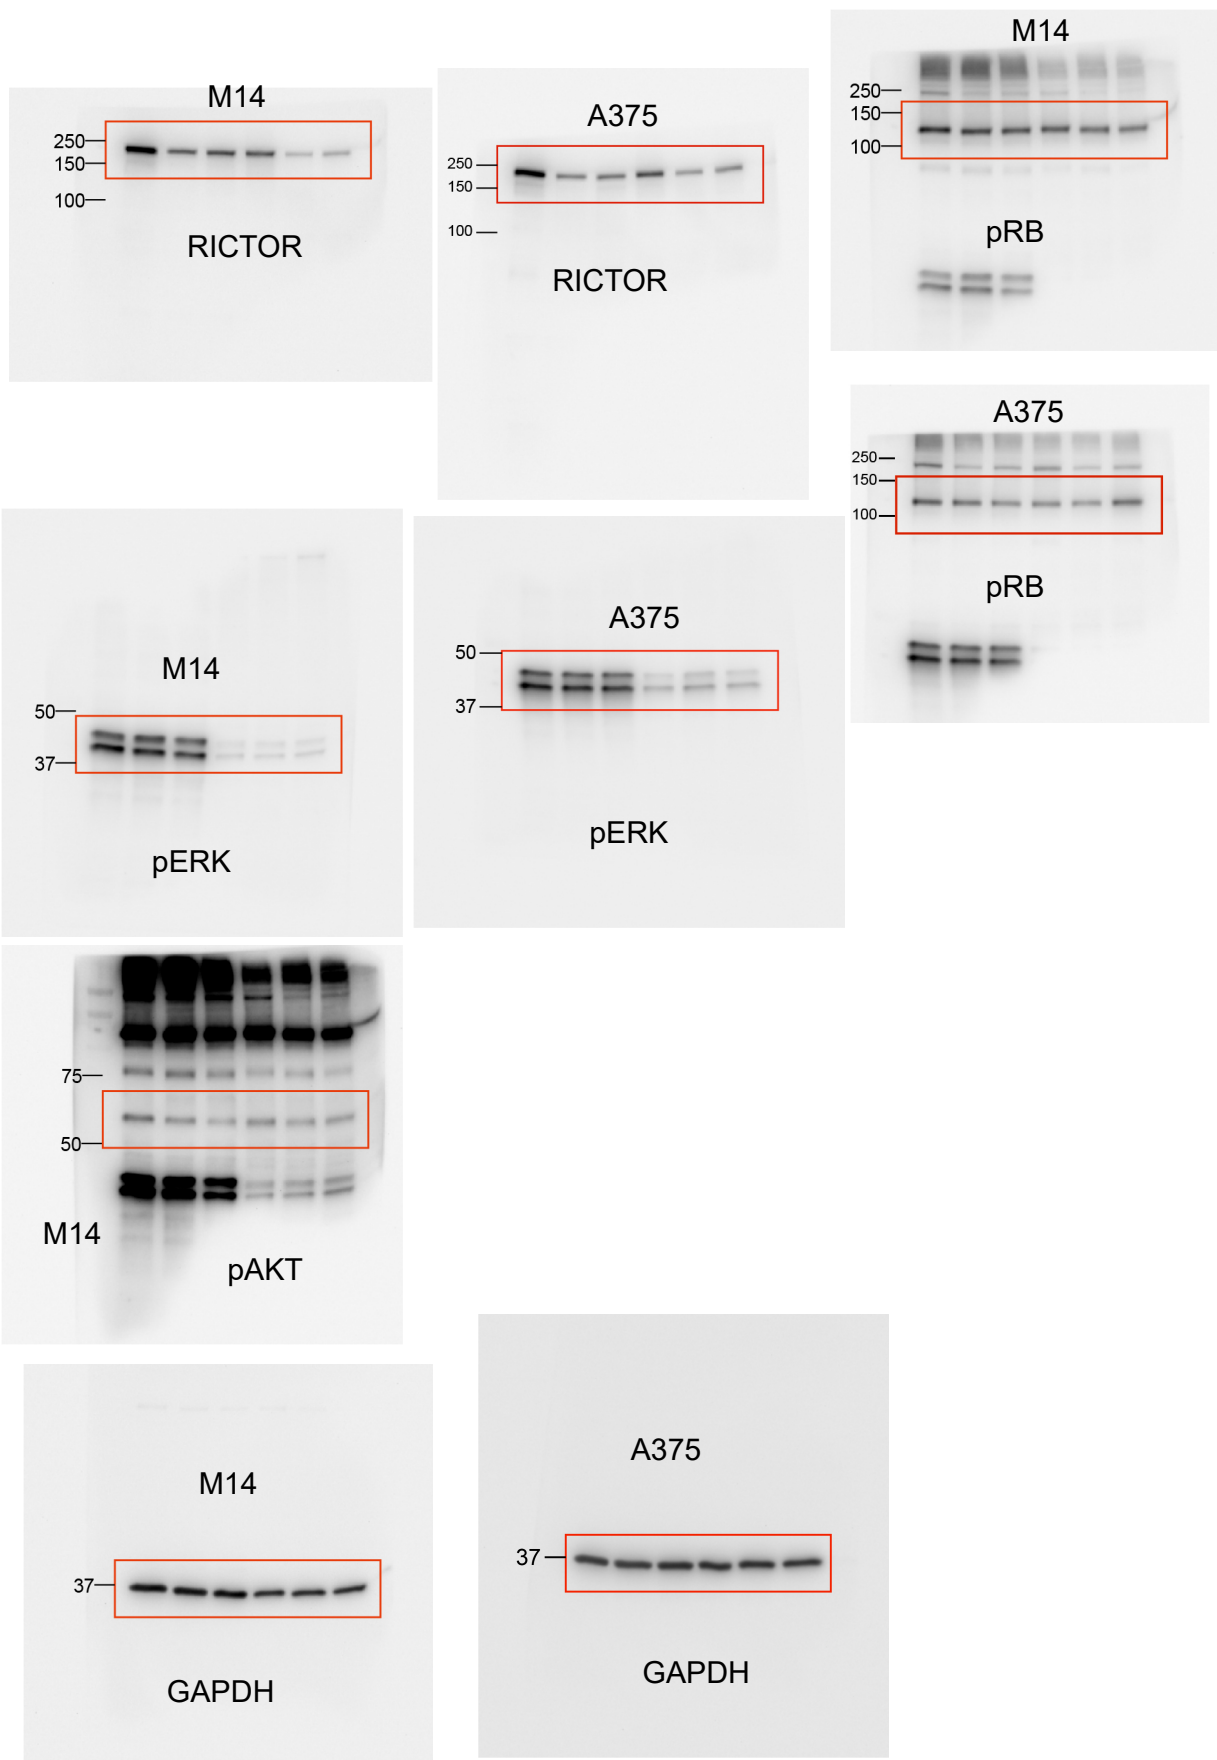

Figure 3E

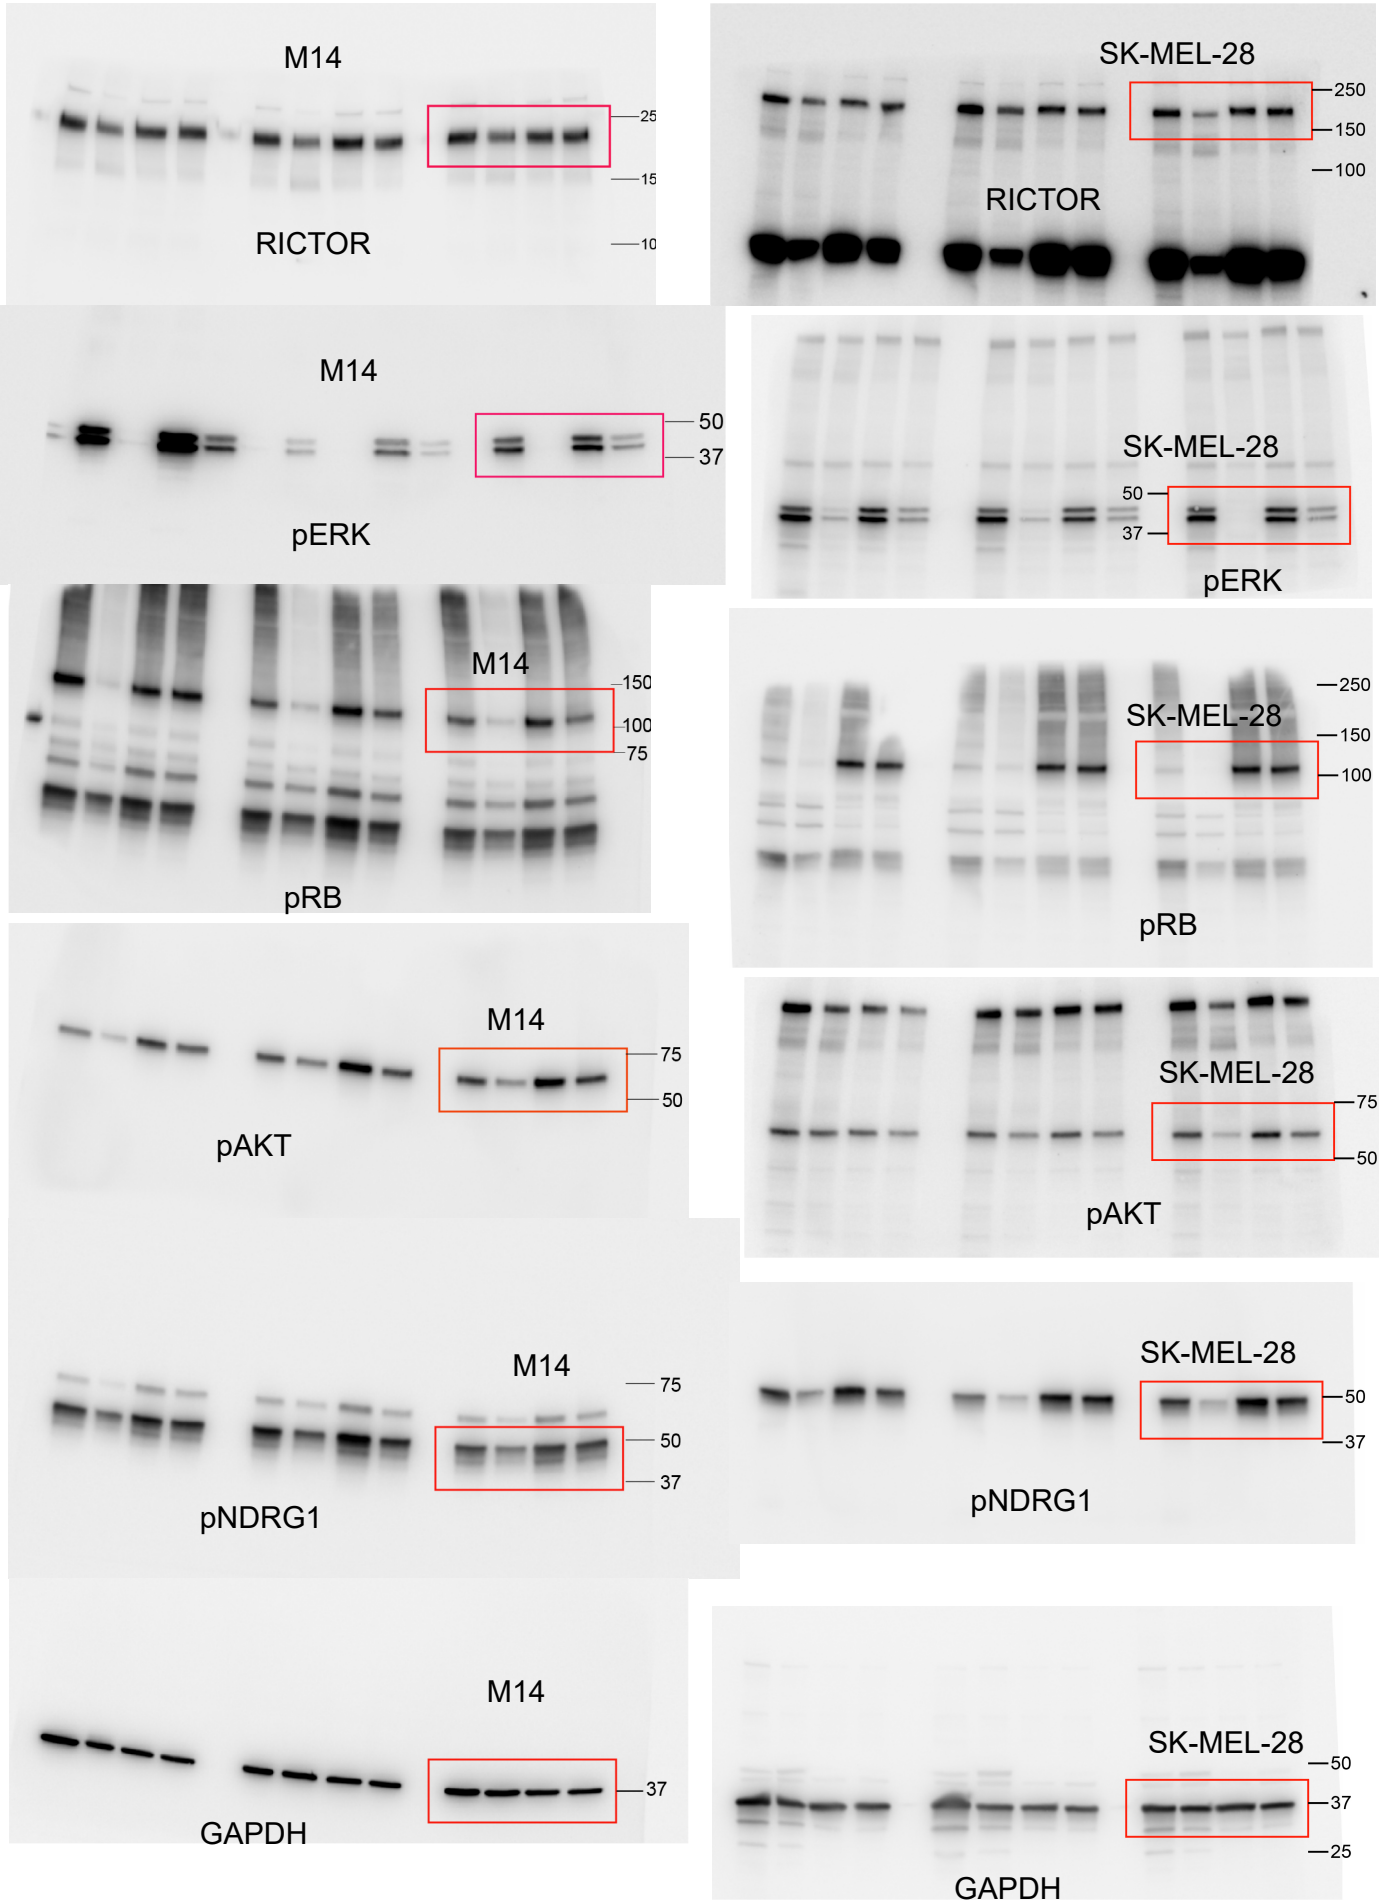

Figure 3E

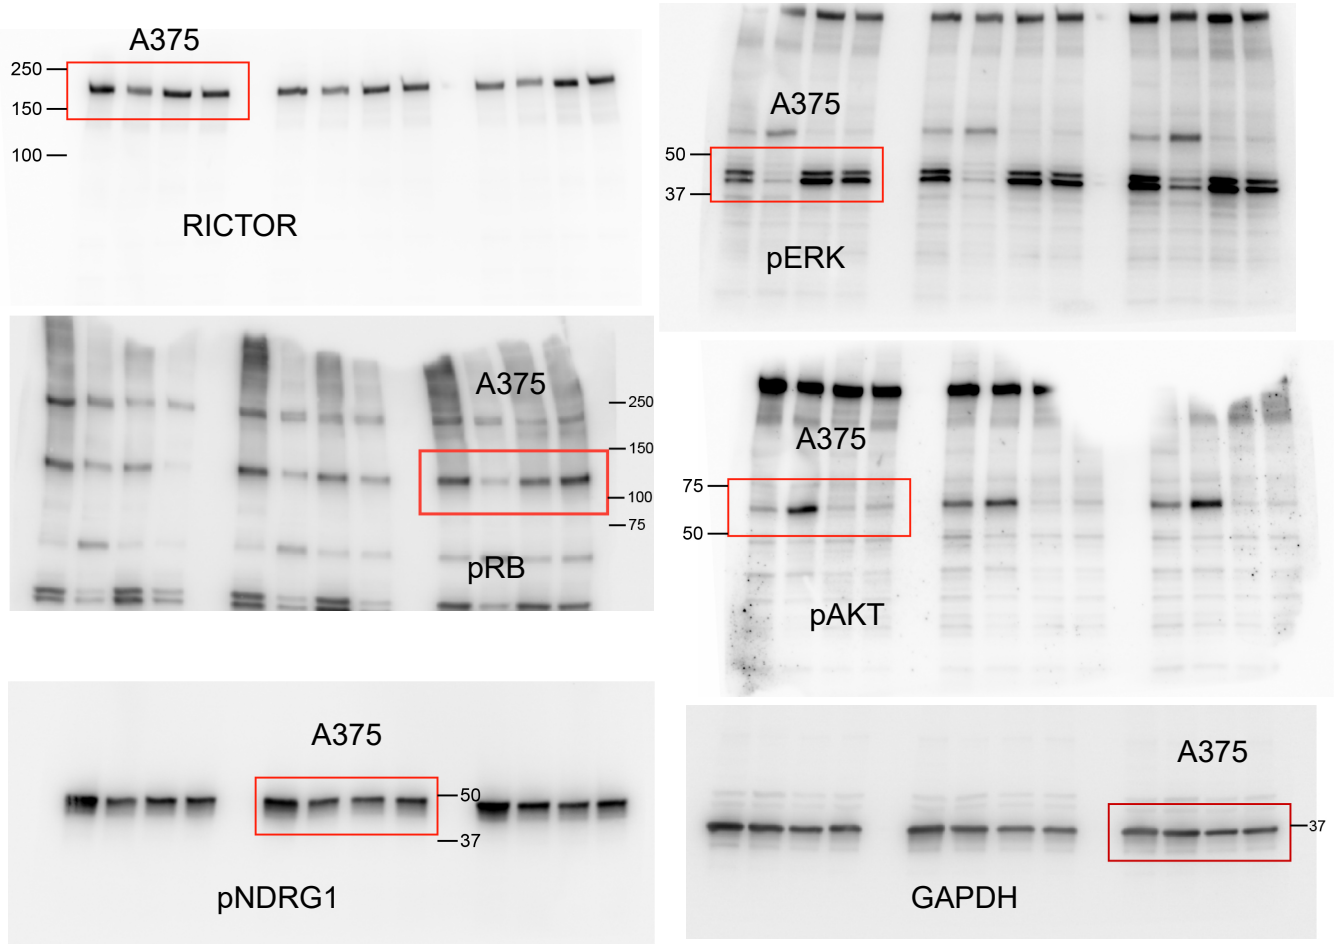

Figure 3F

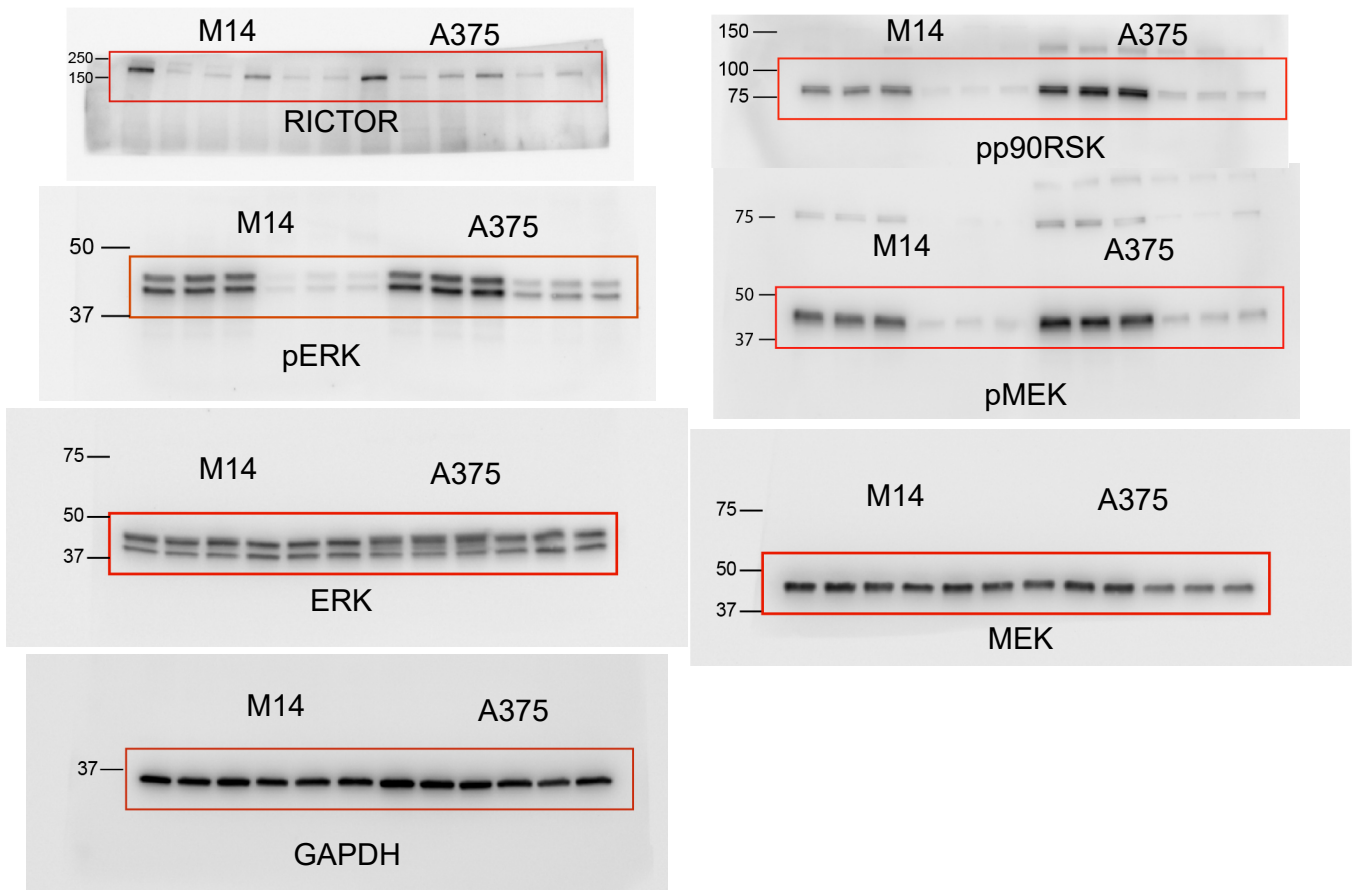

Figure 4C

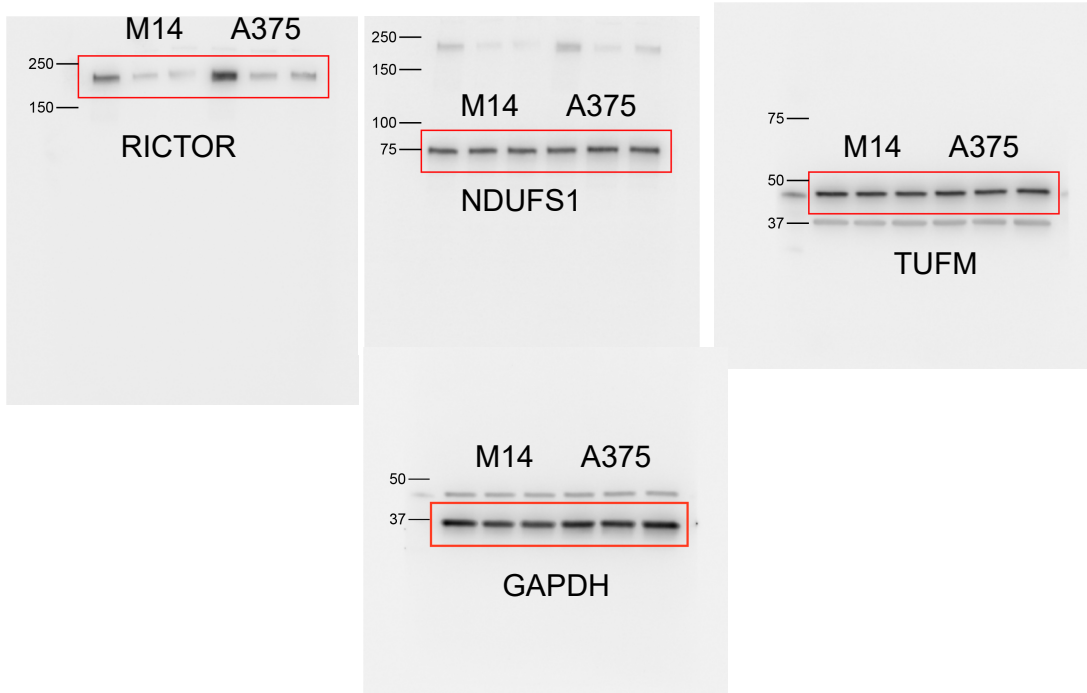

Figure 4E TUFM

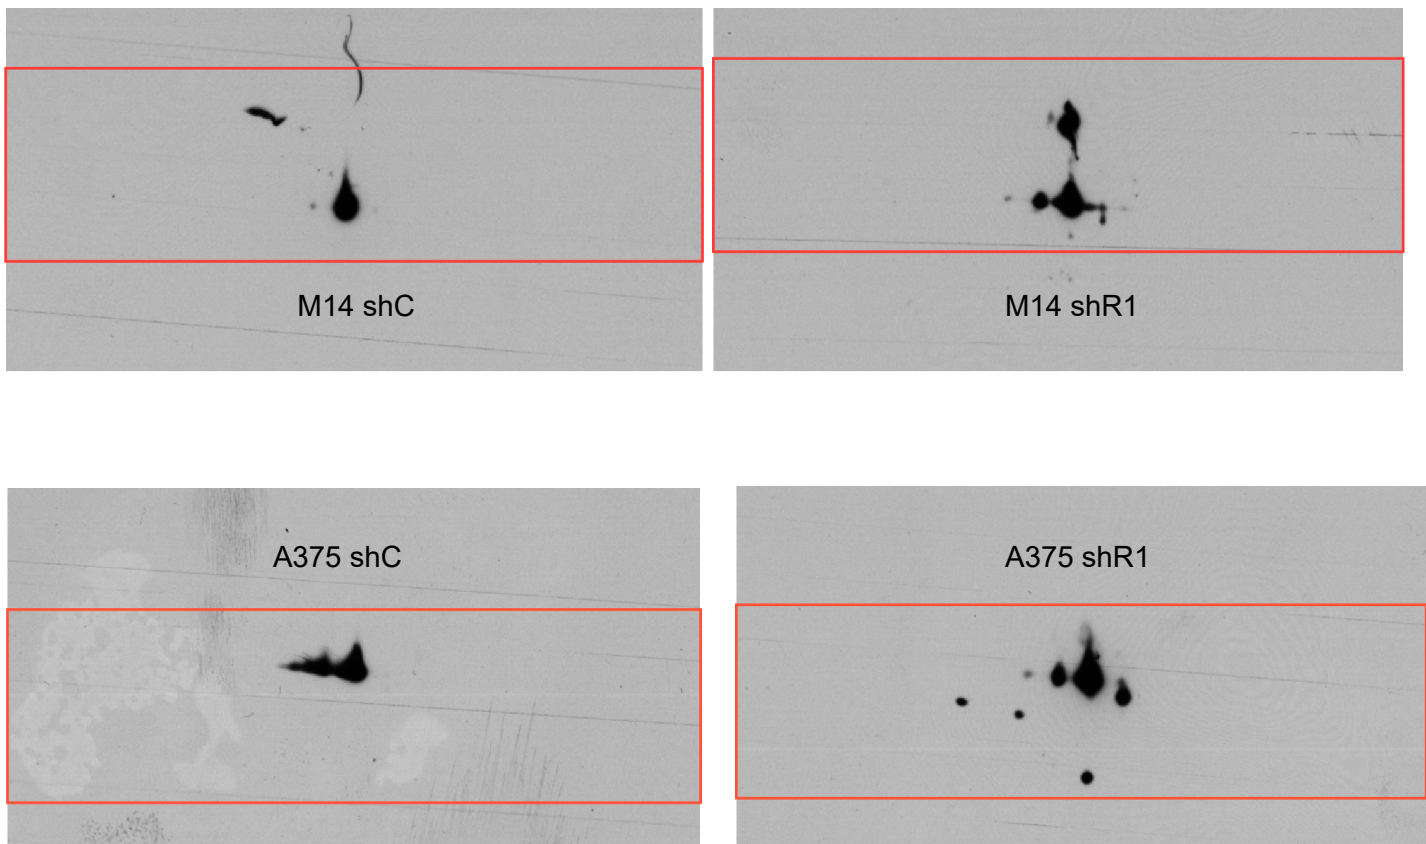

Figure 4D

NDUFS1

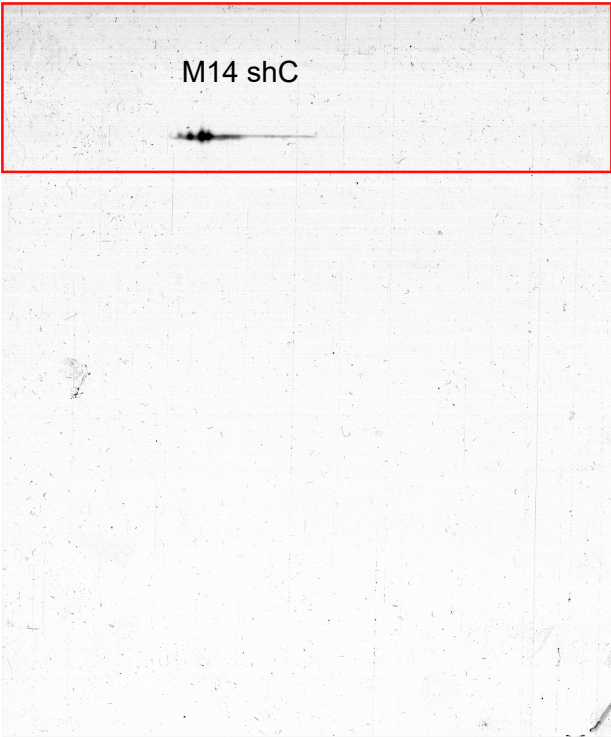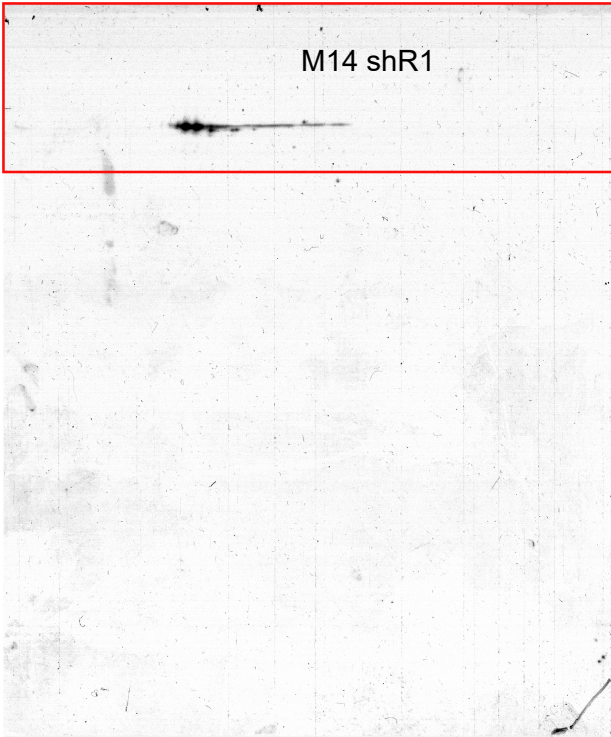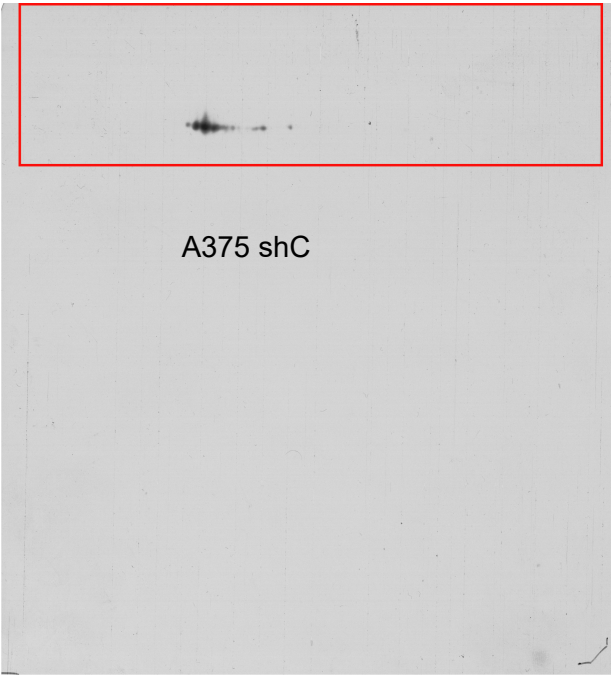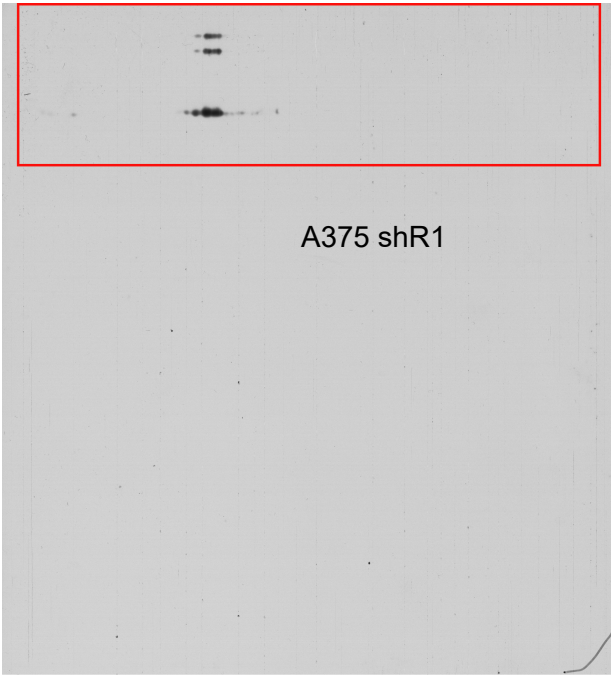



Figure 5A

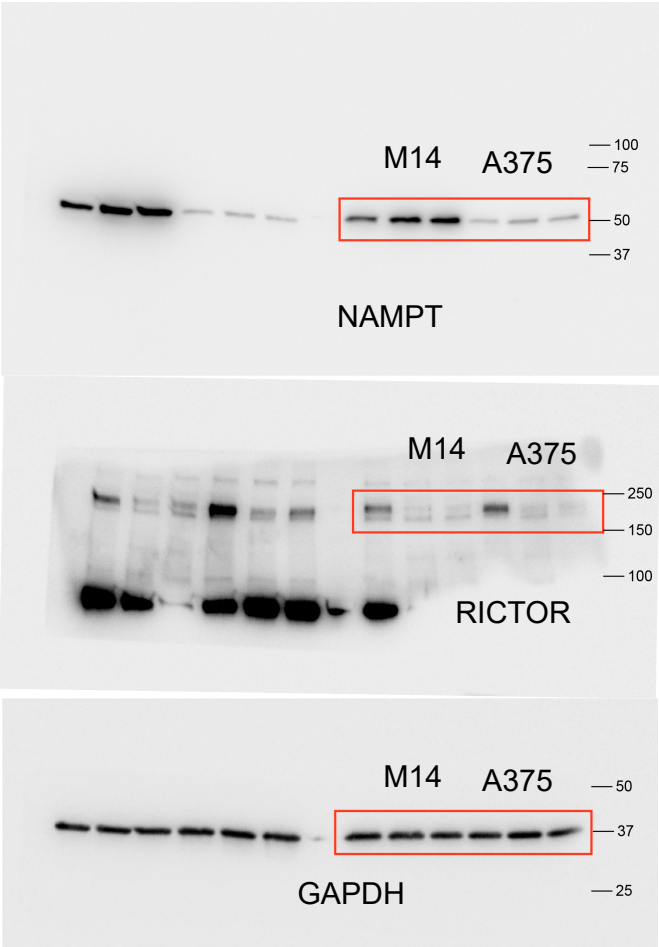

Figure 5D NAMPT

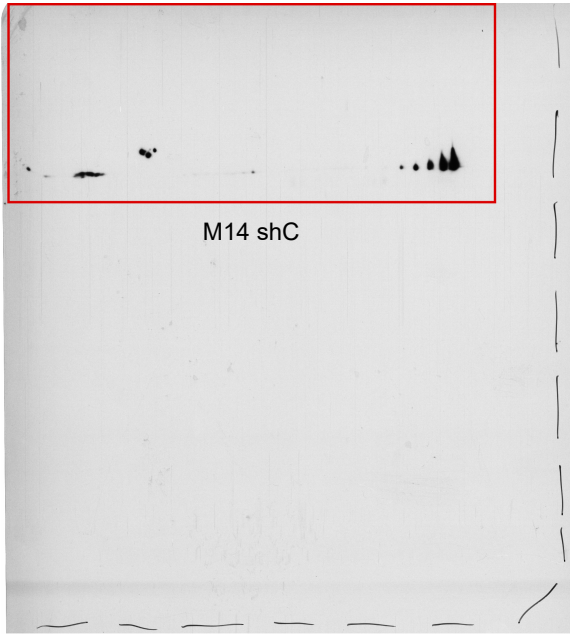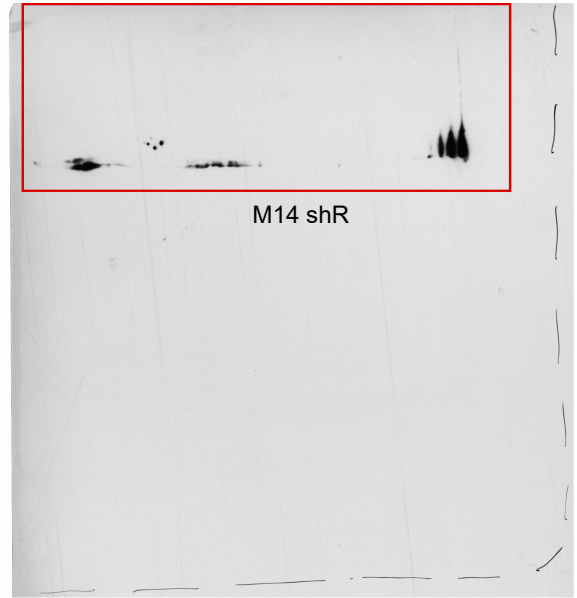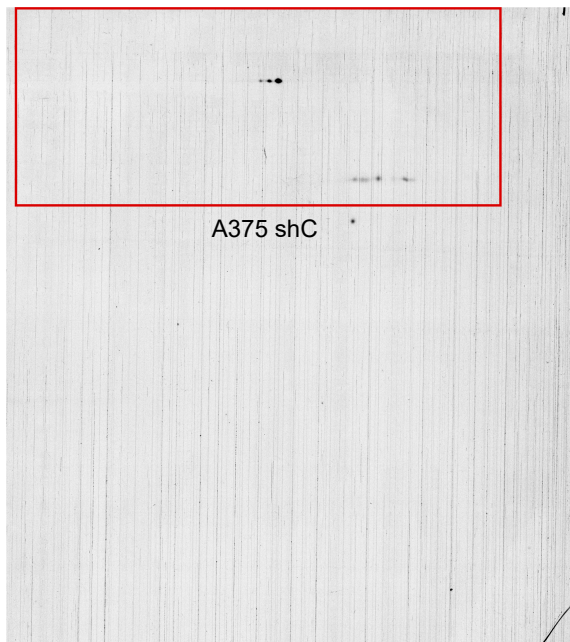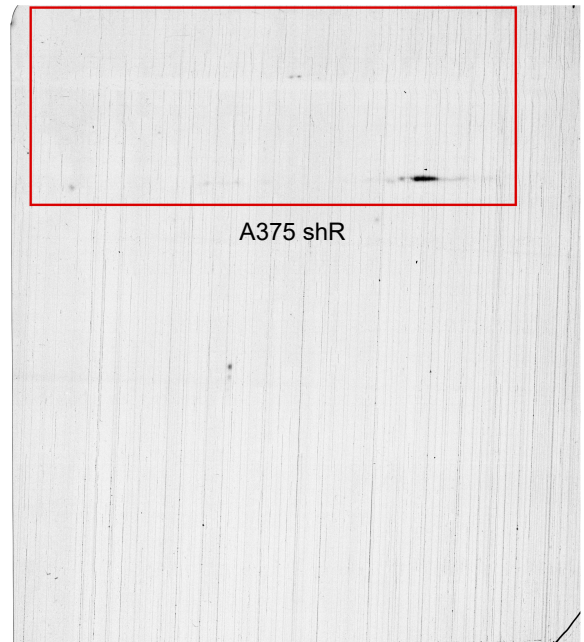

Figure S3D

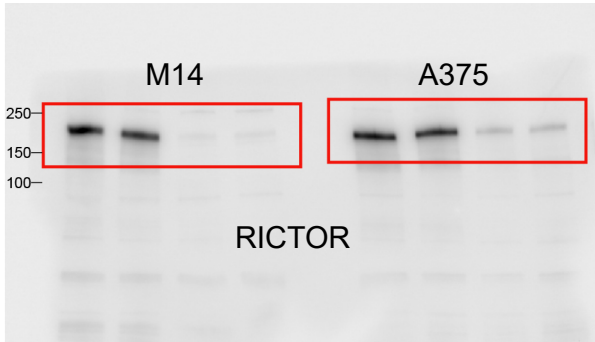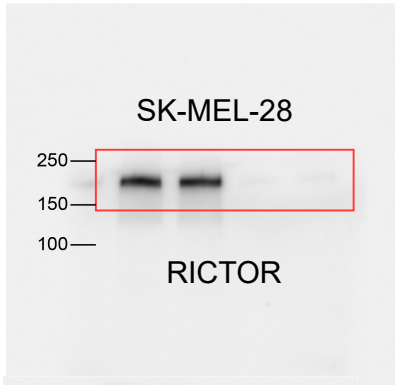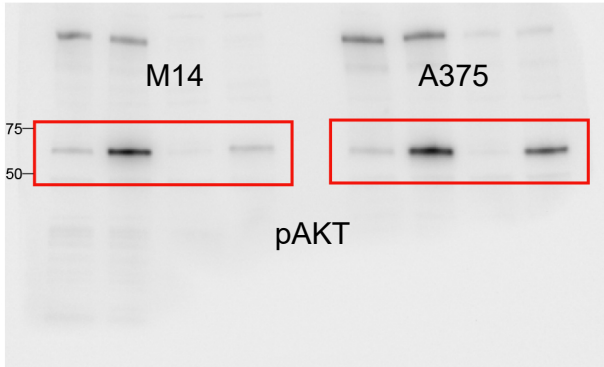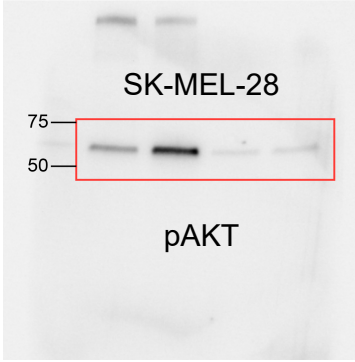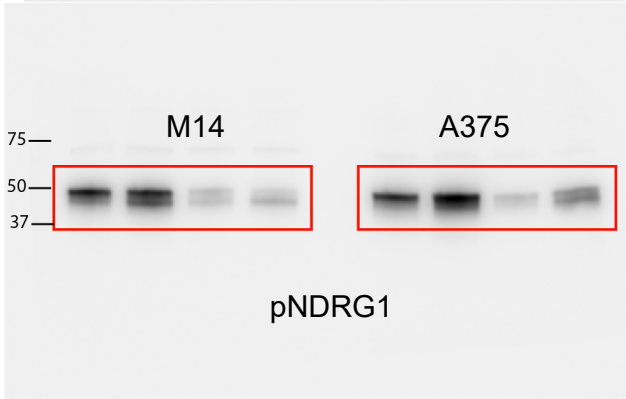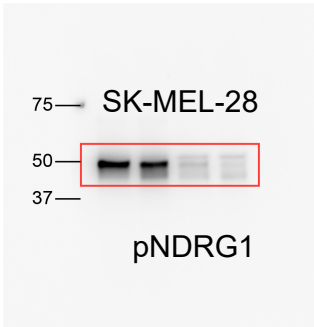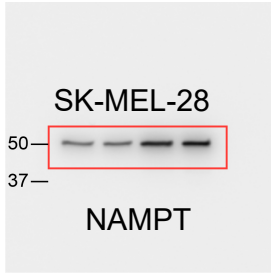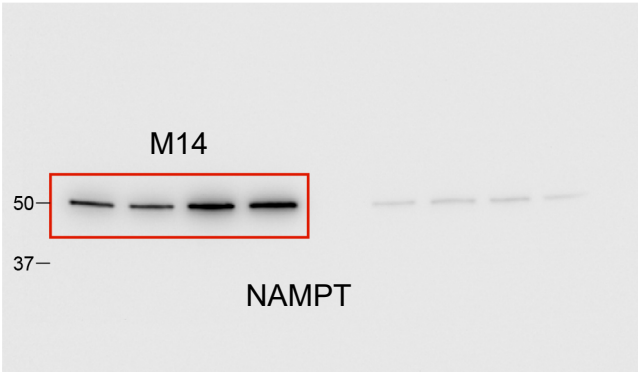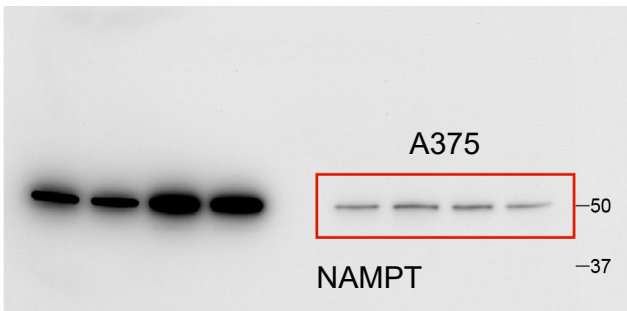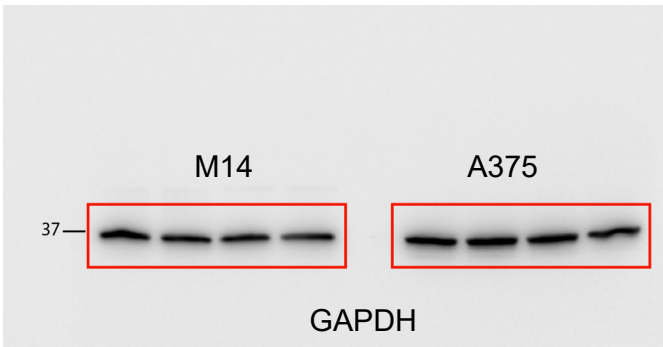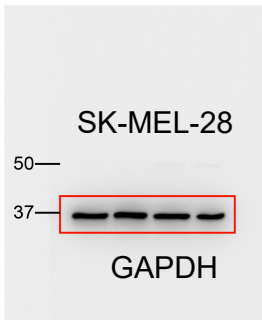

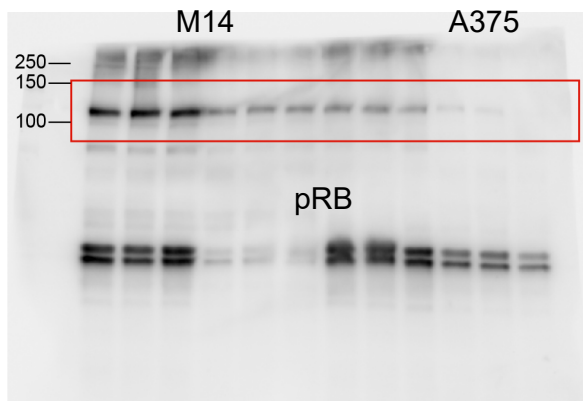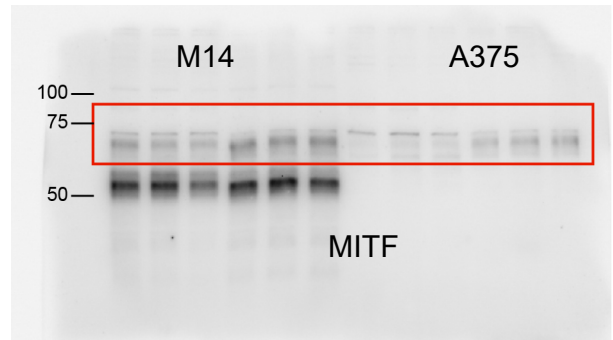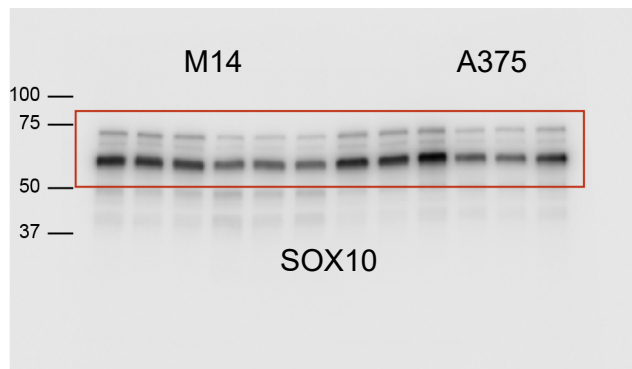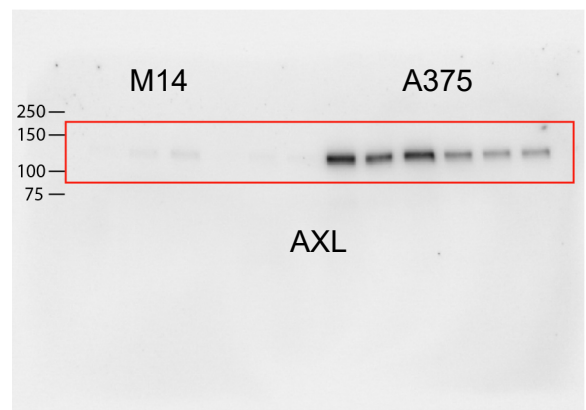

Supplement: 12943_2024_2010_MOESM13_ESM.pdf [file 12943_2024_2010_MOESM13_ESM.pdf]
