# Supplementary material for: RICTOR/mTORC2 downregulation in BRAFV600E melanoma cells promotes resistance to BRAF/MEK inhibition
Source: PubMed Central journal article supplement (PMC11097536; doi:10.1186/s12943-024-02010-1), 2024-05-16

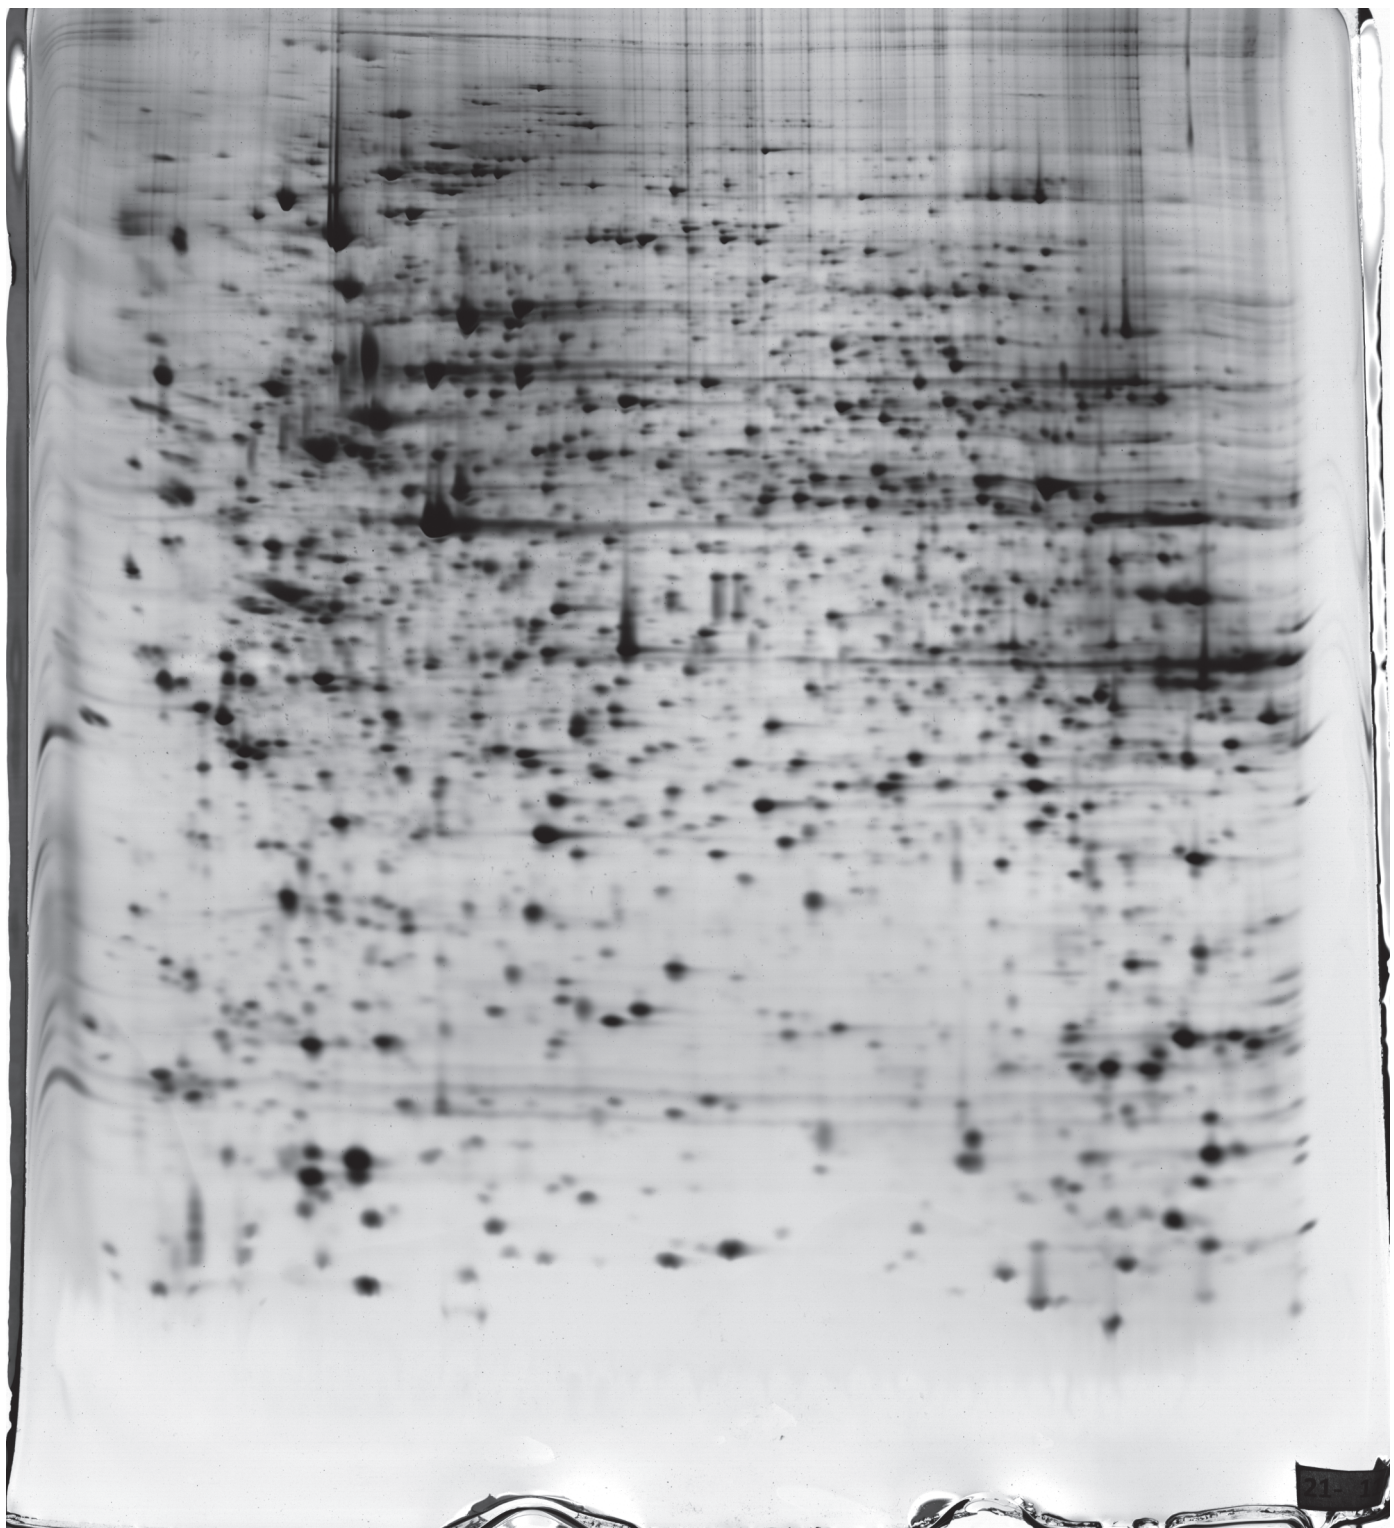

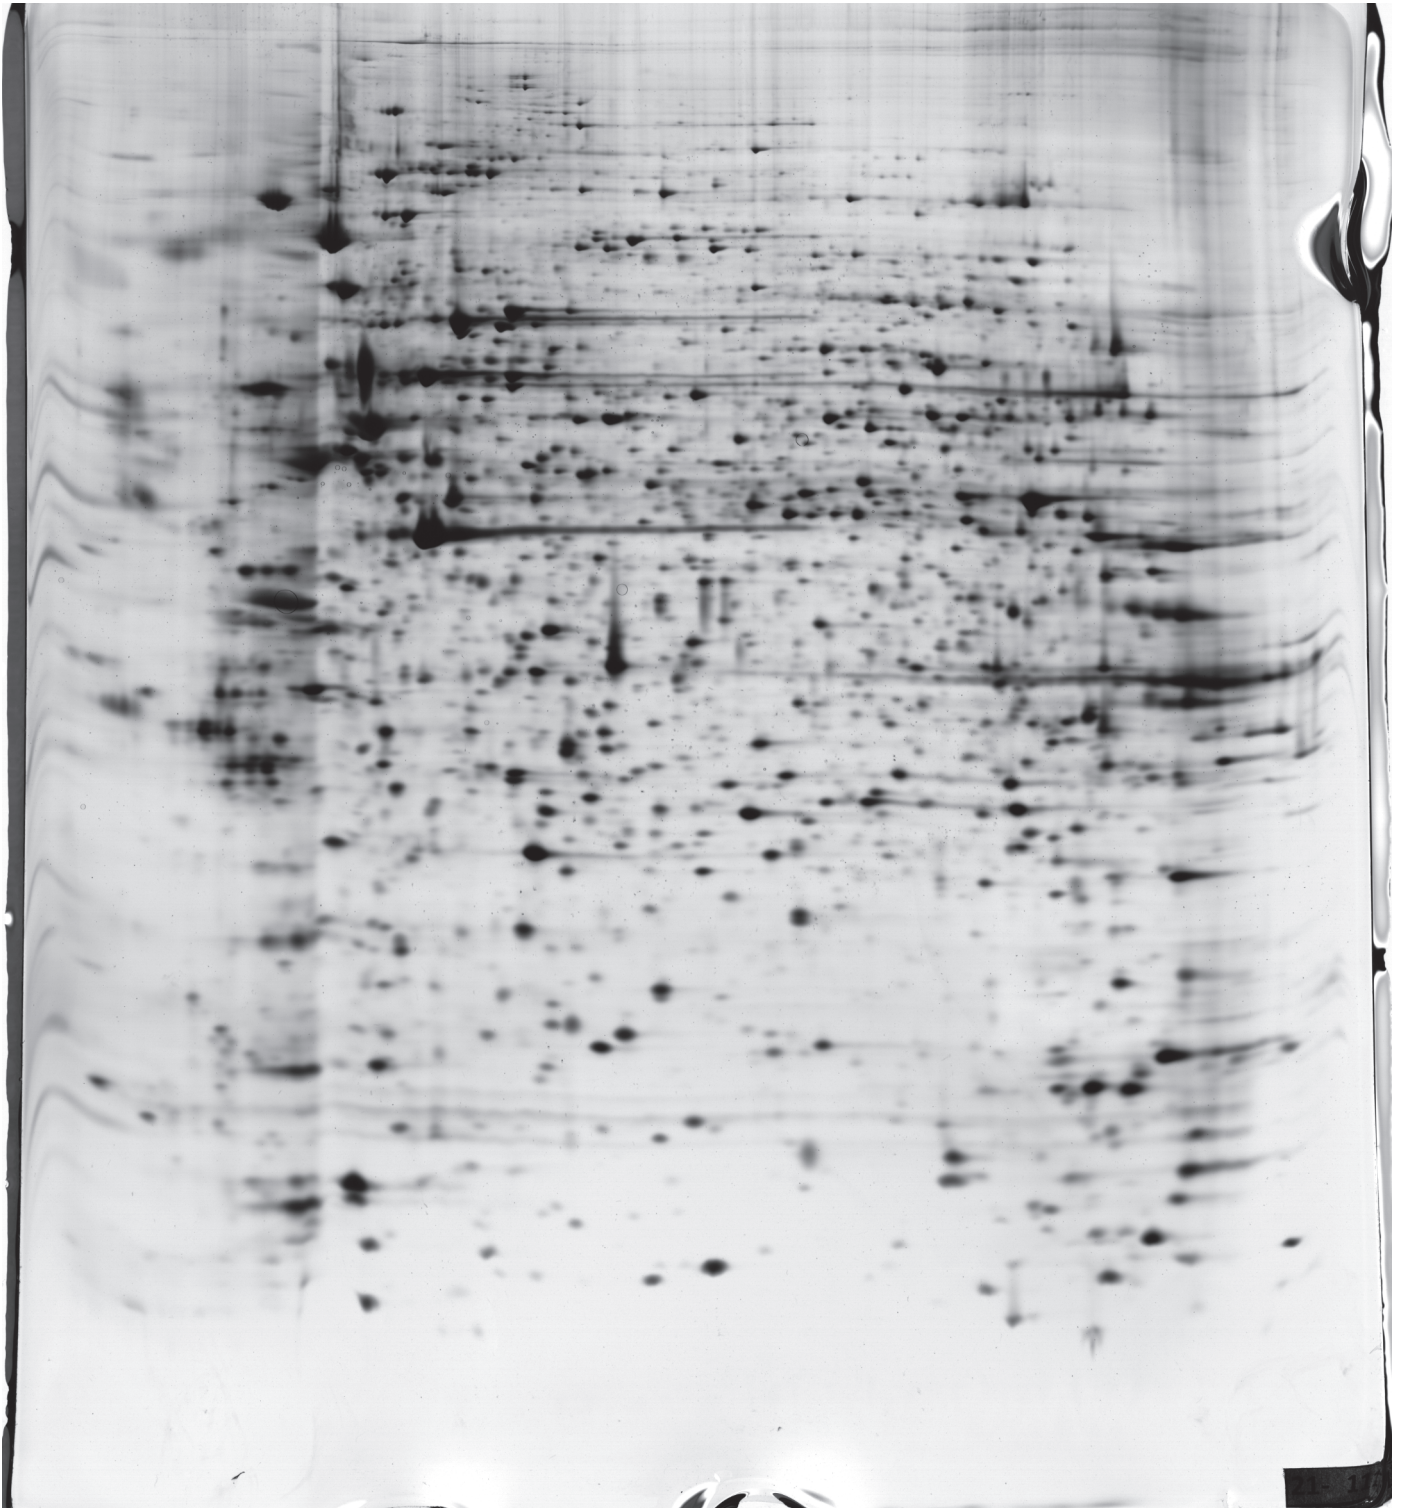

M14 shC 3

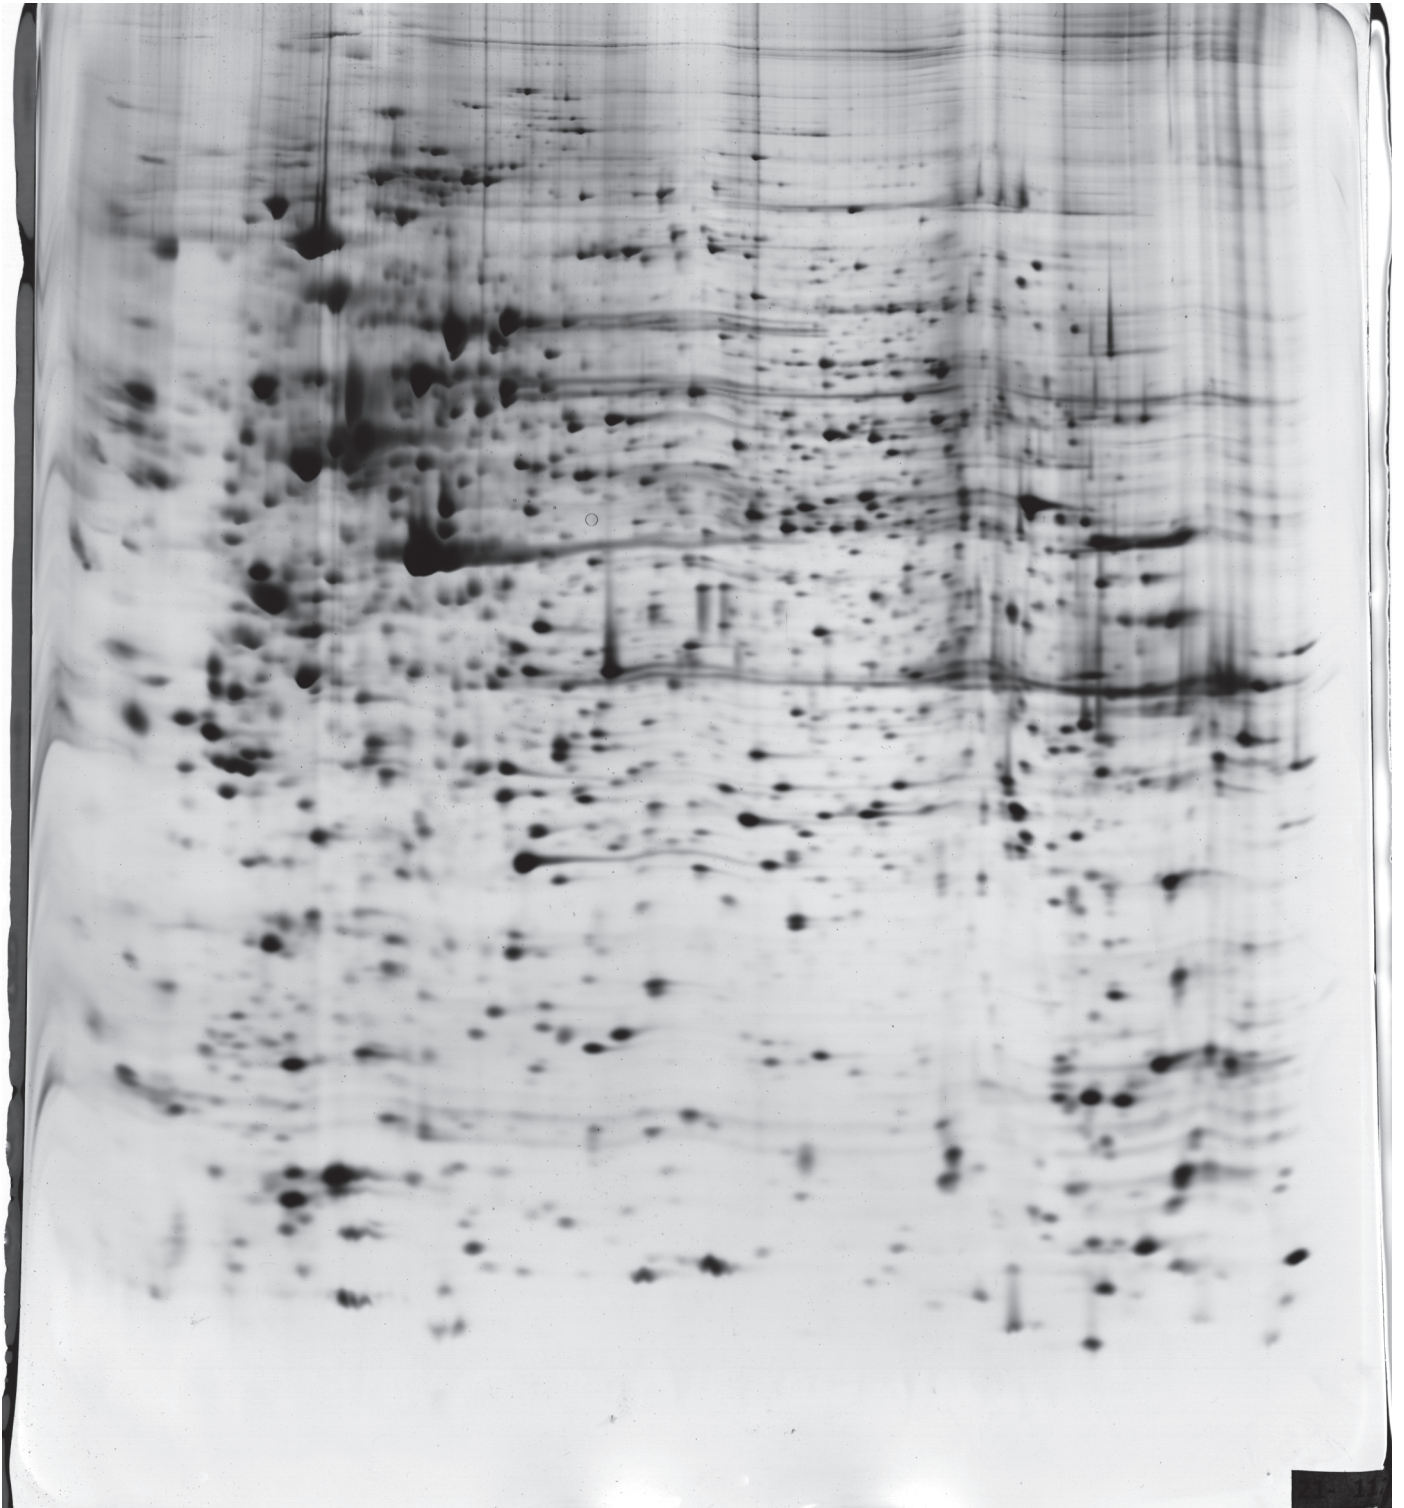

M14 shC 4

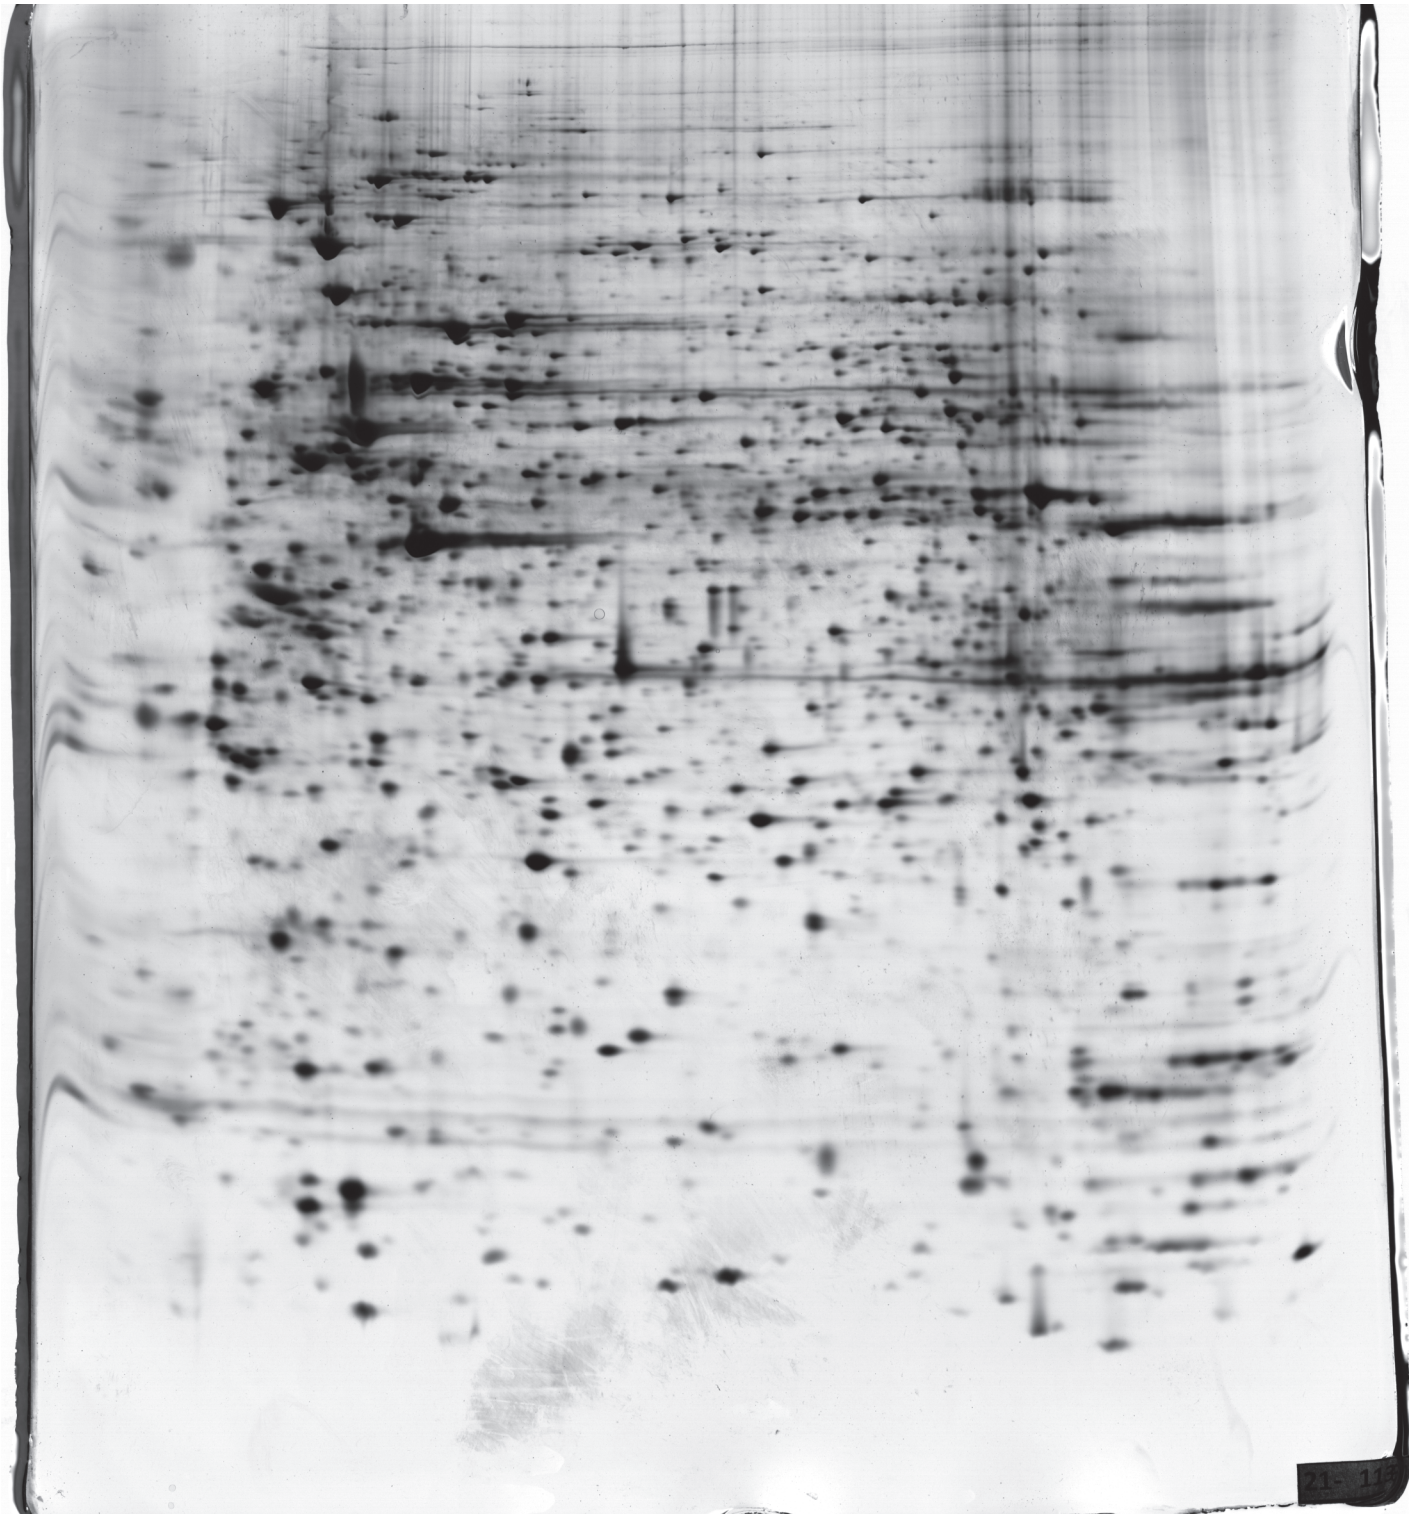

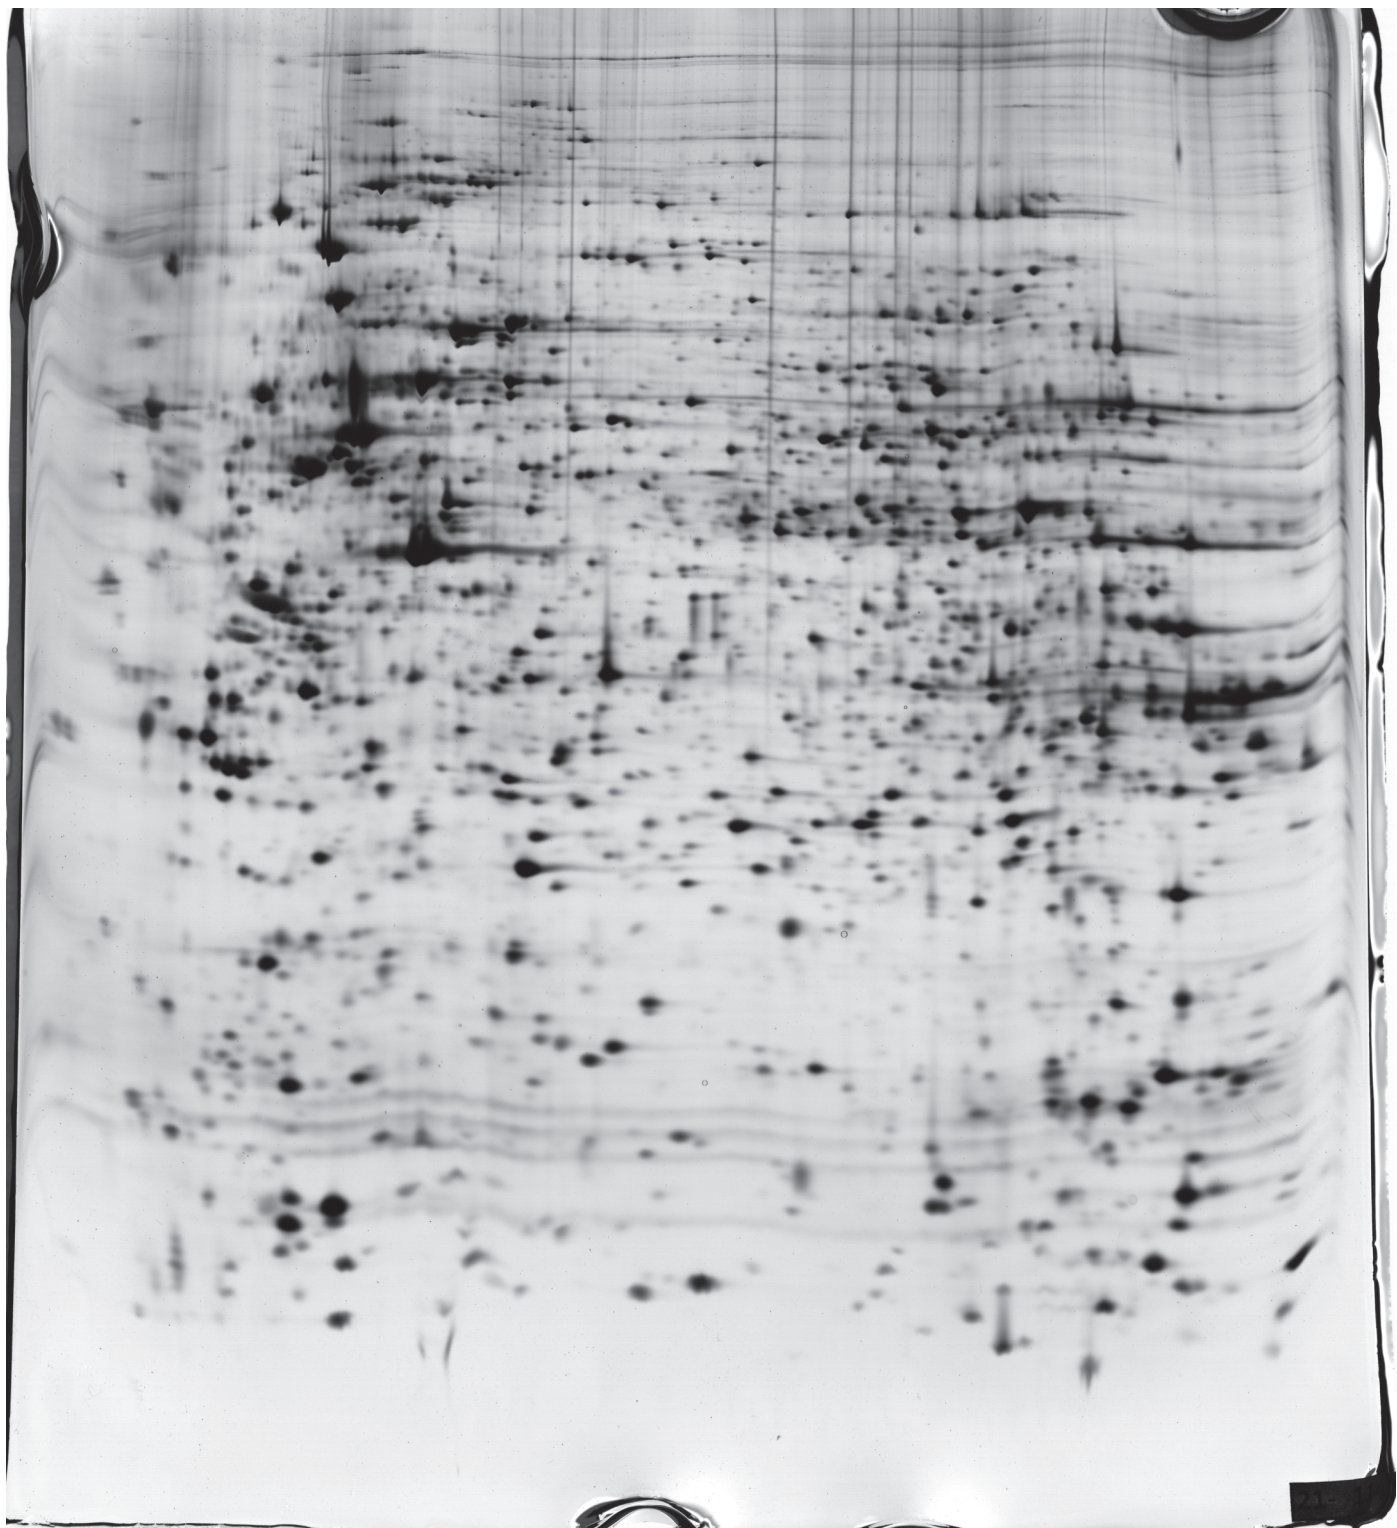

M14 shR 1

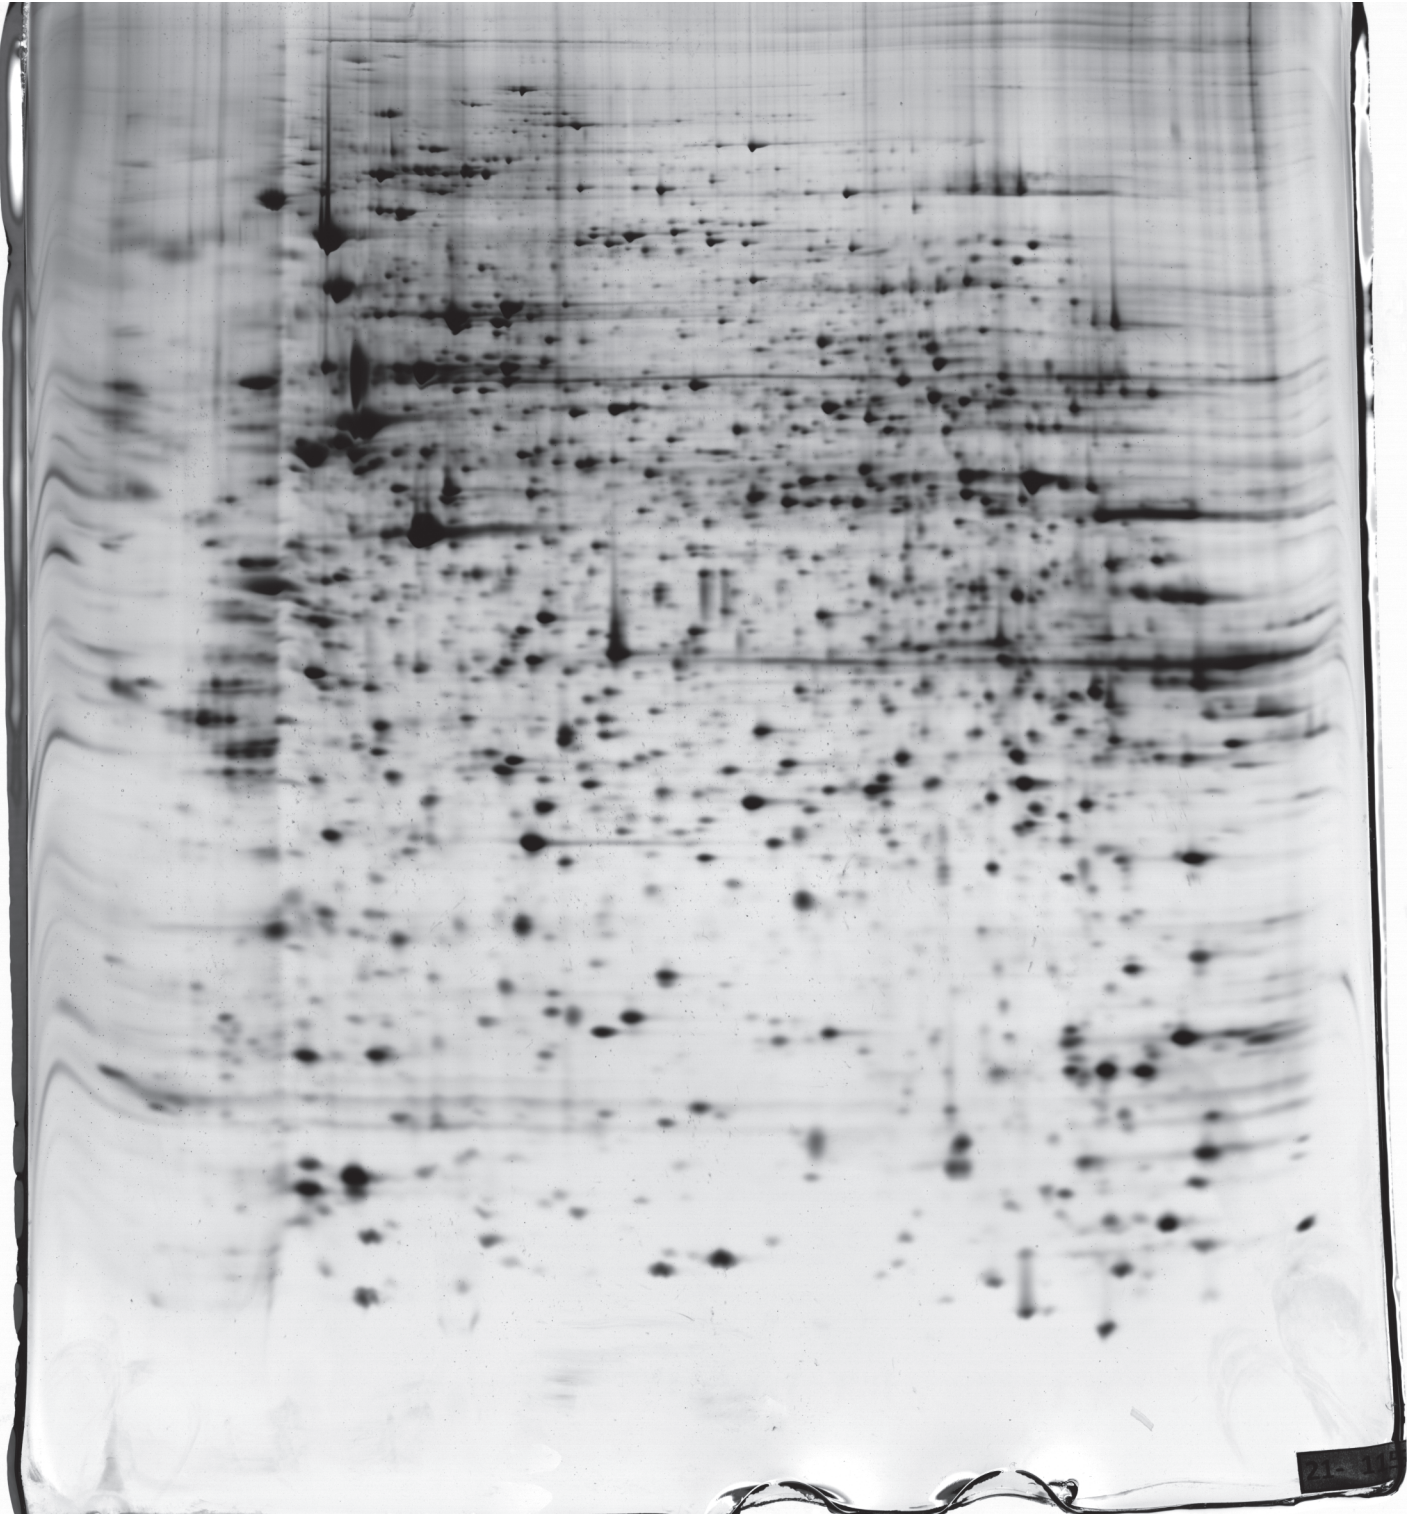

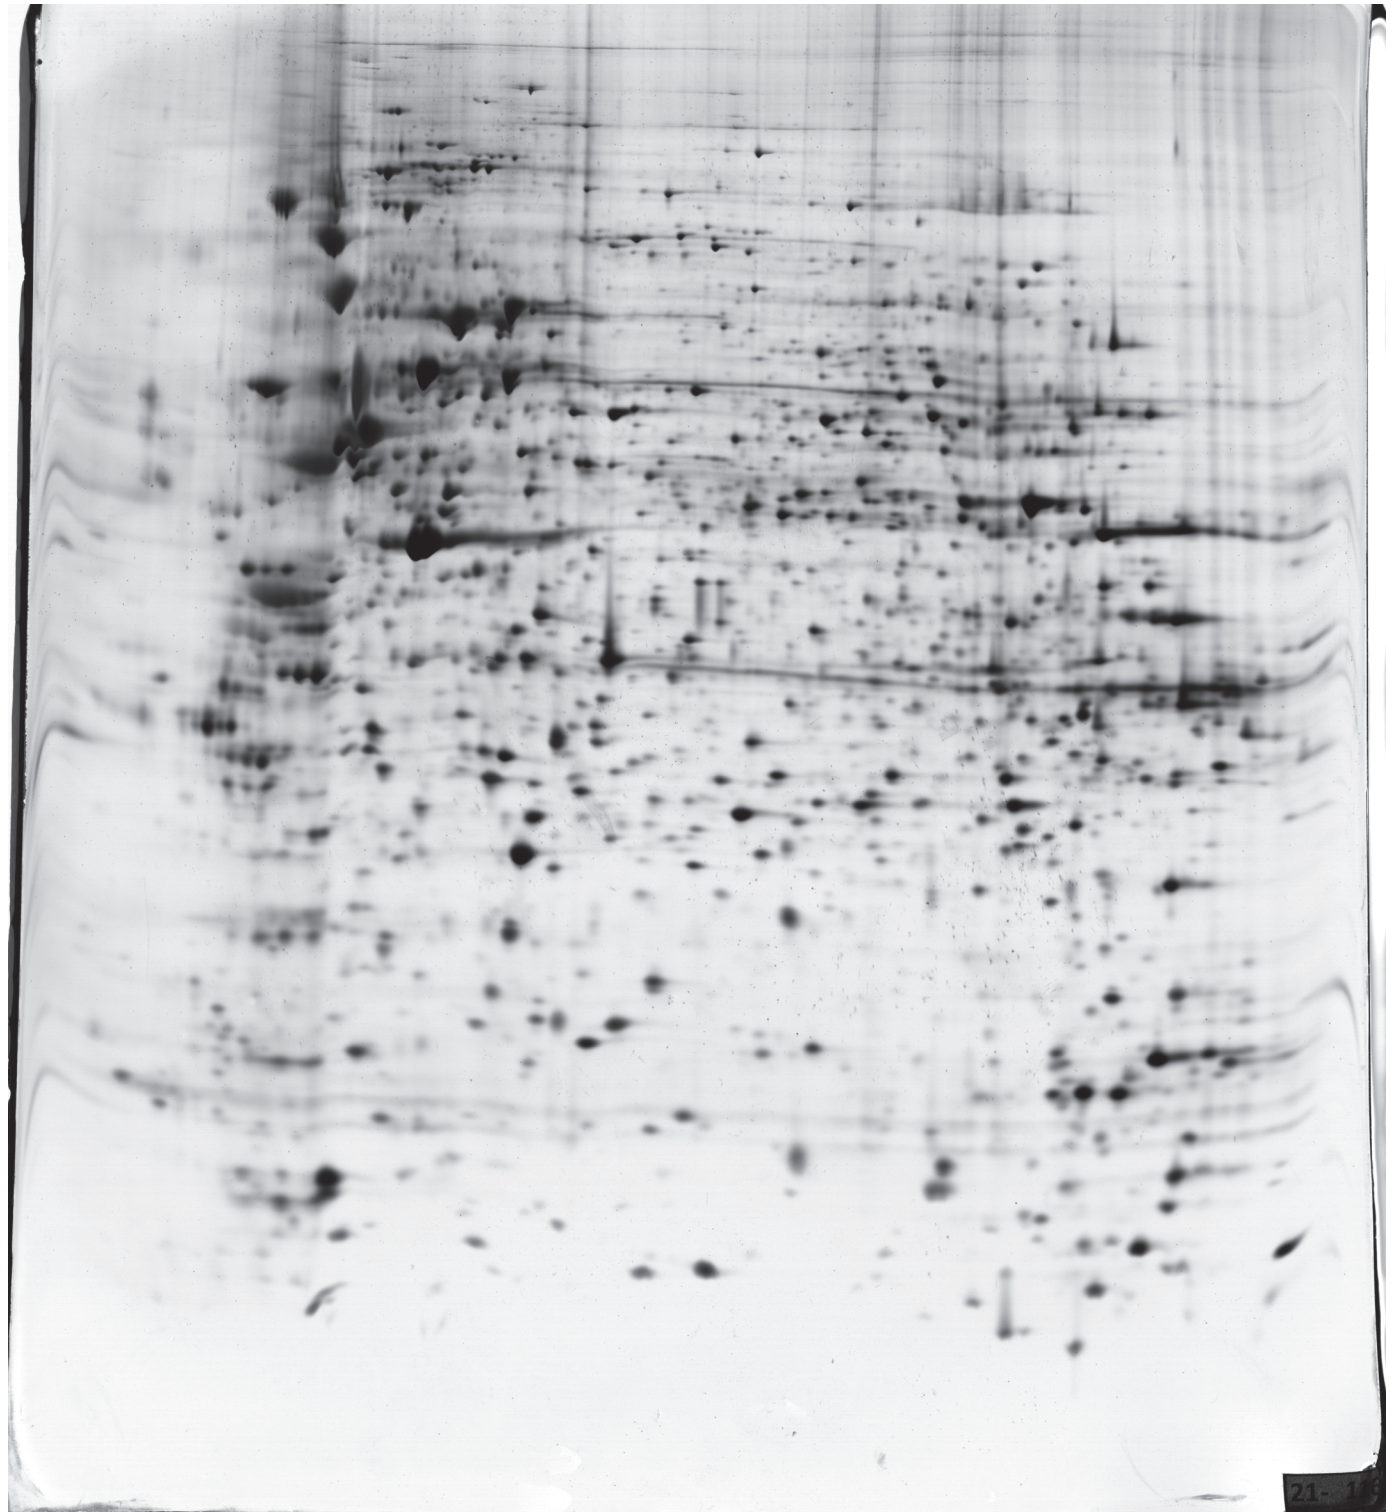

M14 shR3

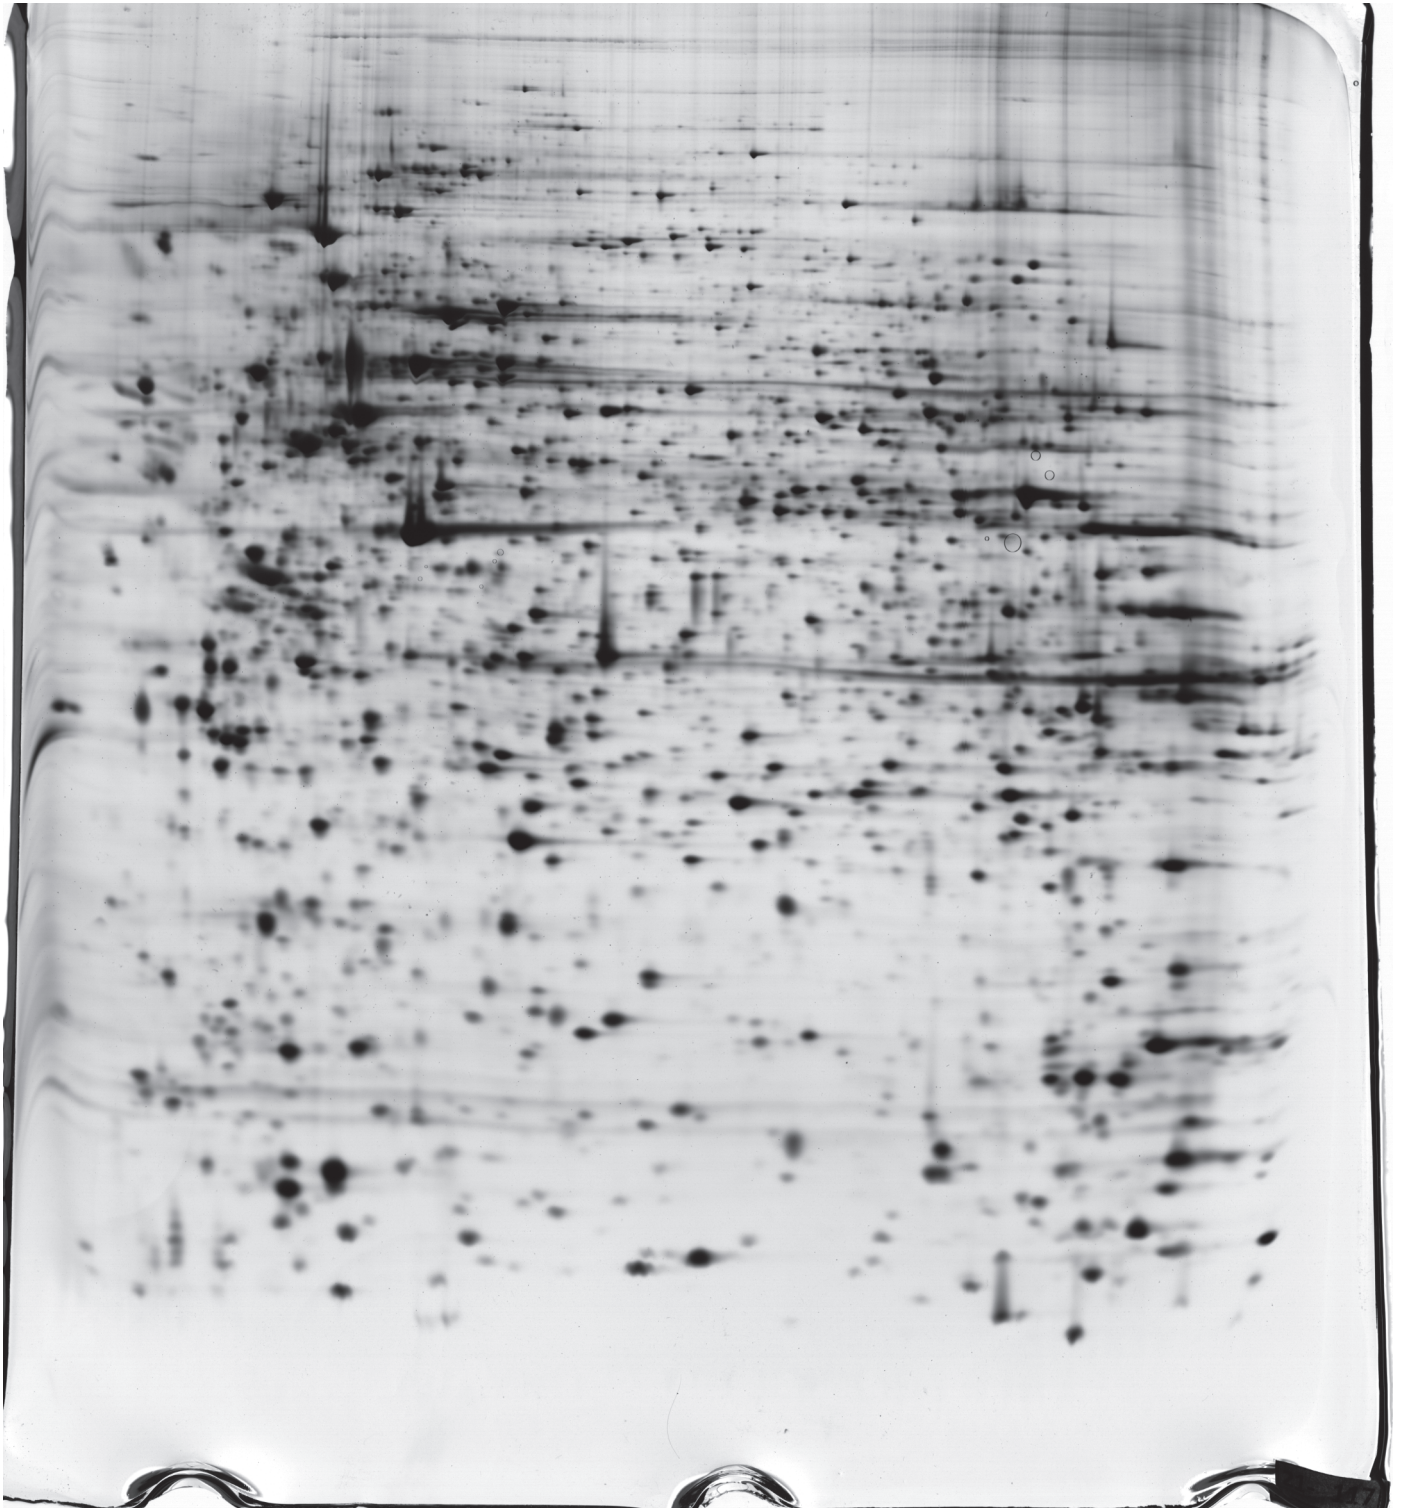



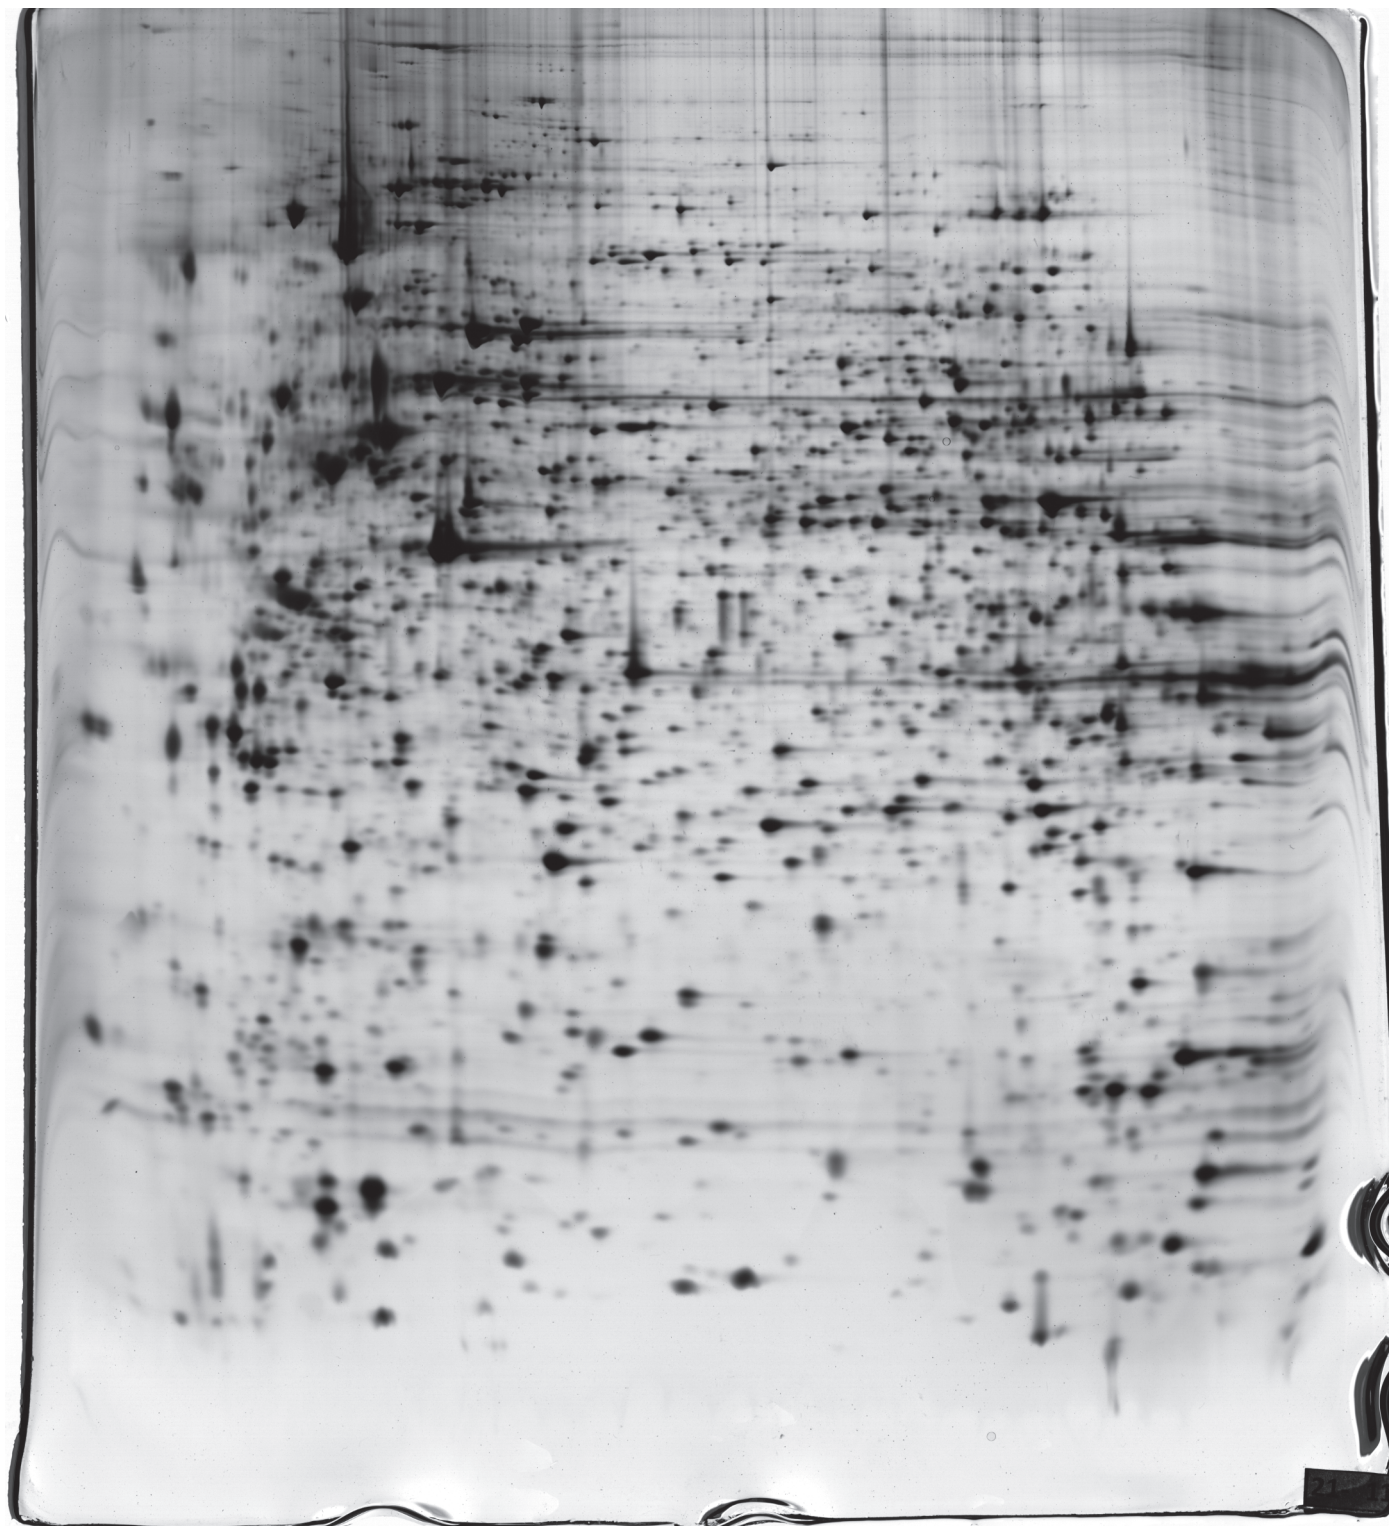

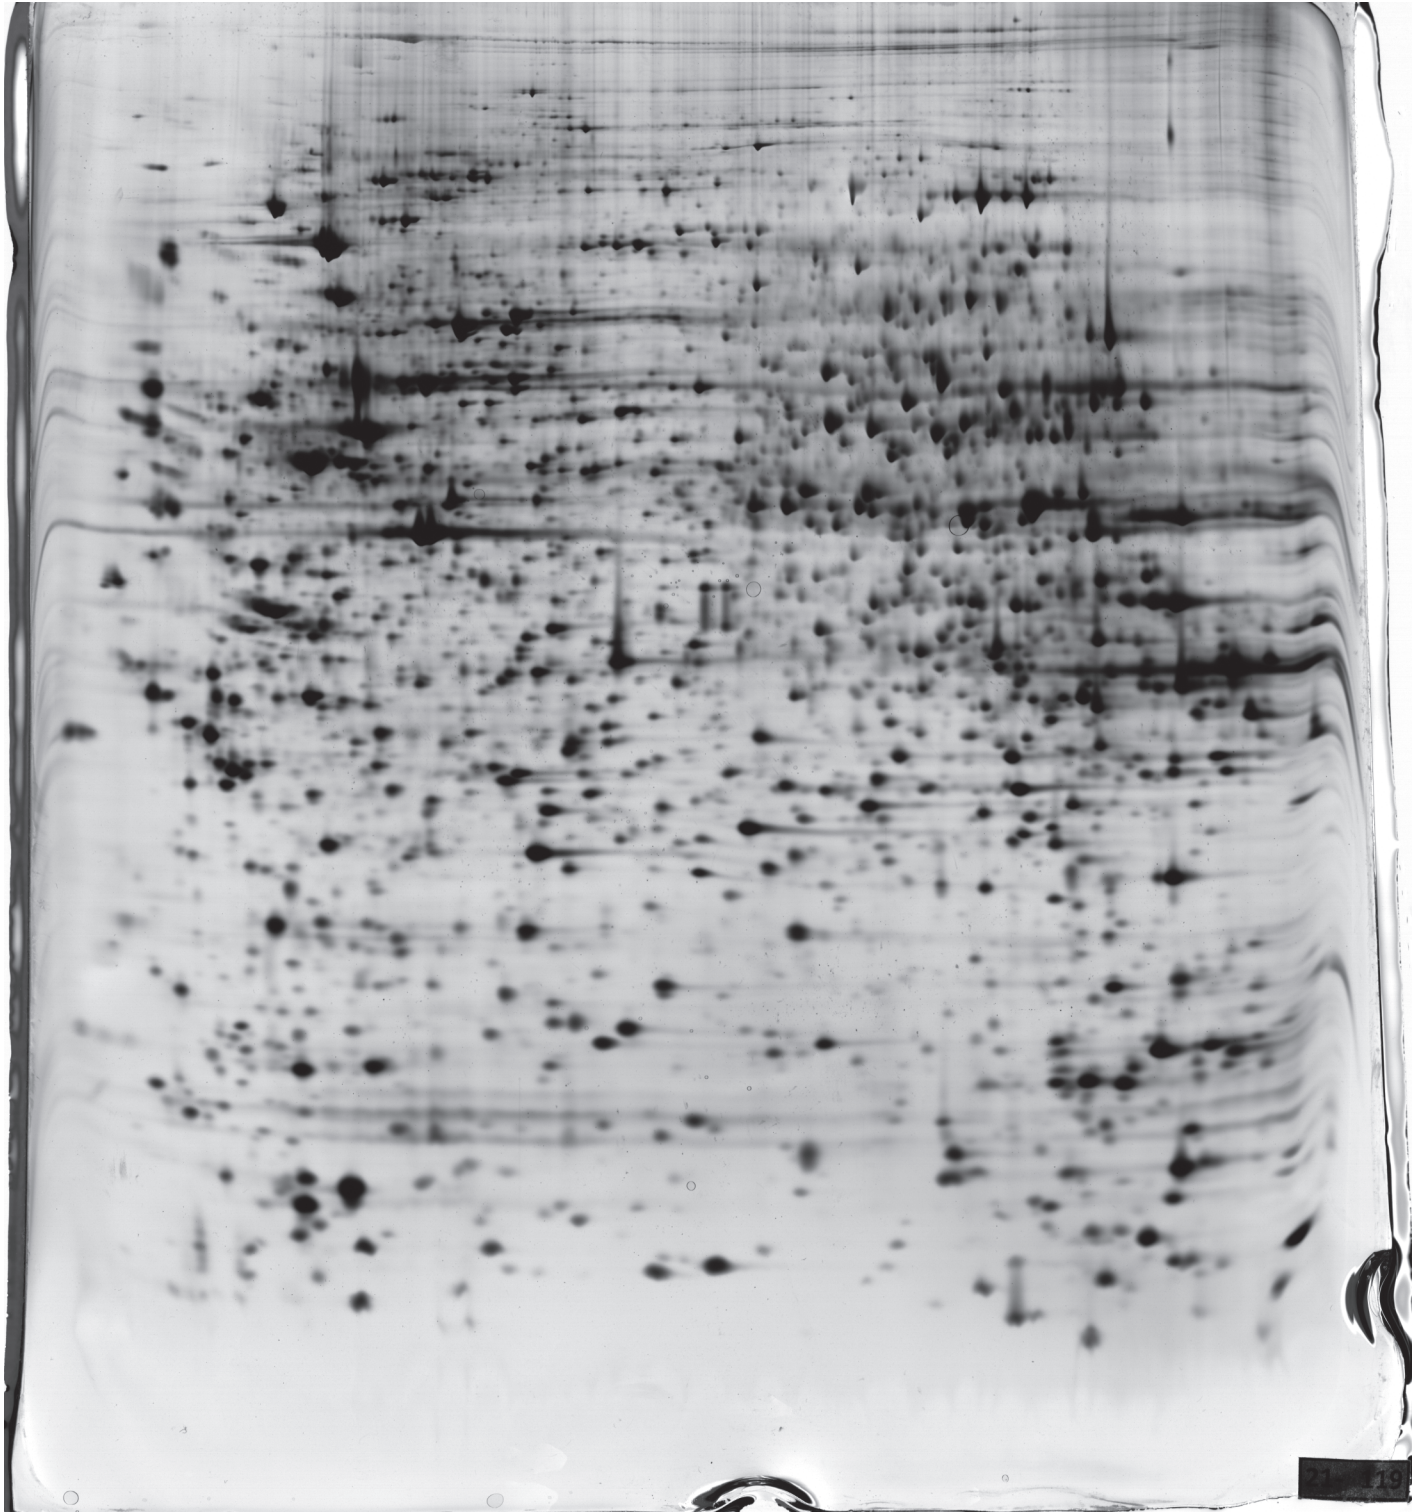

Supplement: 12943_2024_2010_MOESM14_ESM.pdf [file 12943_2024_2010_MOESM14_ESM.pdf]
